# The structure of hippocampal CA1 interactions optimizes spatial coding across experience

Michele Nardin<sup>a</sup>, Jozsef Csicsvari<sup>a</sup>, Gašper Tkačik<sup>a</sup>, and Cristina Savin<sup>b,\*</sup>

<sup>a</sup>Institute of Science and Technology Austria, AT-3400 Klosterneuburg, Austria; <sup>b</sup>New York University, New York NY-10003, USA

1 **Although much is known about how single neurons in the hippocampus**  
2 **represent an animal's position, how cell-cell interactions contribute to spatial coding**  
3 **remains poorly understood. Using a novel statistical estimator and theoretical modeling,**  
4 **both developed in the framework of maximum entropy models, we reveal highly structured**  
5 **cell-to-cell interactions whose statistics depend on familiar vs. novel**  
6 **environment. In both conditions the circuit interactions optimize the**  
7 **encoding of spatial information, but for regimes that differ in the**  
8 **signal-to-noise ratio of their spatial inputs. Moreover, the topology**  
9 **of the interactions facilitates linear decodability, making the information**  
10 **easy to read out by downstream circuits. These findings suggest**  
11 **that the efficient coding hypothesis is not applicable only to individual**  
12 **neuron properties in the sensory periphery, but also to neural**  
13 **interactions in the central brain.**  
14

Neural coding | Noise correlations | Hippocampus | Maximum entropy models | Network topology

1 The dual role of the hippocampal formation in memory  
2 (1, 2) and spatial navigation (3, 4) is reflected in two distinct  
3 views on hippocampal coding: the place field view (5, 6) that  
4 reduces the encoding of spatial information to tuning properties  
5 of individual neurons, and the ensemble view (7, 8) that  
6 focuses on subsets of units that are co-activated together as  
7 the substrate for memory (9). Recent results blur the line  
8 between the single cell and the population perspective (10),  
9 revealing that properties of individual neurons only partially  
10 explain the circuit's contribution to spatial encoding. Interactions  
11 between neurons shape collective hippocampal activity  
12 (11) and contribute to the spatial representation. Disrupting  
13 correlations between neurons leads to decreased decoding accuracy,  
14 in particular in CA1 (10). It remains unclear how experience  
15 shapes the organization of cell-to-cell interactions and what effects  
16 such changes may have on the encoding of spatial information in  
17 CA1 populations.

18 Experience affects the properties of single cells in many  
19 ways. While reliable position-dependent spiking is detectable  
20 after a few minutes during the very first exposure to a novel  
21 environment (12, 13), the responses to a familiar environment  
22 show several systematic differences, including a reduction in  
23 overall firing, sharpening of tuning functions and sparsification  
24 of responses (14). In parallel, inhibition is weak in novel  
25 environments, transiently opening the gate for circuit reorganization  
26 via plasticity (15), but it subsequently increases with experience  
27 (15–17). From the perspective of the local circuit, the main  
28 afferents to CA1 (MEC and CA3) are initially noisier (18, 19)  
29 and have weaker spatial tuning, which improves with familiarity  
30 (13, 20, 21). Since CA1 needs both inputs for detailed  
31 spatial representation (22, 23), these results suggest that the  
32 CA1 circuit is potentially in a different dynamic regime in  
33 novel versus familiar environments, with distinct local circuit  
34 interactions and population coding properties.

35 Correlations among pairs of hippocampal neurons arise

36 as a result of two effects: their spatial tuning overlap (i.e. *signal*  
37 correlations), and internal circuit dynamics (i.e. *noise*  
38 correlations). Since they reflect local circuit interactions, noise  
39 correlations should depend on changes in input statistics, and  
40 be reorganized by experience. From a neural coding perspective,  
41 the structure of neural correlations can radically affect the amount  
42 of information that a population carries about stimuli (here, the  
43 animal's position) and the complexity of the readout (24, 25).  
44 While noise correlations are generally considered to be an obstacle  
45 to optimal information coding and transfer, especially in sensory  
46 areas (26, 27), there are scenarios where they can improve the  
47 quality of the overall population output (28–31), which might be  
48 relevant for the hippocampus.  
49

50 Unlike sensory areas, where stimulus repeats make the estimation  
51 of noise correlations relatively straightforward, measuring circuit  
52 interactions and their contribution to spatial coding in the  
53 hippocampus is fraught with technical difficulties. In a two  
54 dimensional environment, the lack of stimulus repeats renders  
55 traditional approaches for estimating noise correlations inapplicable.  
56 Moreover, well documented circuit level oscillations (32, 33)  
57 act as global sources of co-modulation that obscure the fine  
58 structure of pairwise neural co-variability. The key challenge is  
59 to partition total neural covariability into an explainable  
60 component, driven by position and oscillations, and unexplained,  
61 or 'excess' correlations, which capture local interactions.  
62

63 Here we take advantage of the maximum entropy framework to  
64 develop a new statistical test for detecting excess correlations  
65 without stimulus repeats, and explore their significance for the  
66 encoding of spatial information in CA1. Our method allows us to  
67 robustly detect network interactions by comparing hippocampal  
68 responses against a maximum entropy null model (34) that  
69 optimally captures the cells' place preference and population  
70 synchrony (35). When applied to CA1 tetrode recordings from  
71 rats during open field exploration in familiar and novel  
72 environments, our analysis detected structured excess correlations  
73 preferentially between principal cells with similar place  
74 selectivity and arranged into networks with high clustering  
75 coefficients. These highly structured excess correlations optimize  
76 the encoding of spatial information and facilitate its downstream  
77 readout in both the familiar and novel environment, with  
78 differences reflecting the different signal-to-noise ratio of  
79 spatial inputs in both environments. Taken together, our results  
80 suggest that CA1 local circuitry readjusts to changes in its  
81 inputs so as to improve population-

Author contributions: G.T. and C.S. designed research; M.N., J.C., G.T. and C.S. performed research; M.N. and C.S. analyzed data; M.N., G.T. and C.S. performed theoretical analyses; M.N., G.T., and C.S. wrote the paper.

The authors declare no competing interests.

\*To whom correspondence should be addressed. E-mail: cs5360@nyu.edu

82 level stimulus representation, in line with efficient coding  
83 predictions (29).

## 84 Results

85 **Detecting interacting cells.** To investigate functional connec-  
86 tivity between CA1 neurons and its role in spatial information  
87 coding, we devised a procedure to infer cell-cell interactions  
88 from simultaneous tetrode recordings of hundreds of isolated  
89 units in dorsal hippocampus of behaving rats.

90 Our approach starts by constructing a null model for popu-  
91 lation responses that exactly accounts for the measured spatial  
92 selectivity of each recorded neuron as well as for the moment-  
93 to-moment measured global neural synchrony, but is otherwise  
94 as unstructured as possible (Fig. 1A). This null model is for-  
95 mally a maximum entropy model (see Methods) from which  
96 surrogate neural rasters can be sampled (34). For every cell  
97 pair, the model predicts the expected distribution of pairwise  
98 correlations against which the measured total correlation for  
99 that pair can be tested for significance; we report as “excess  
100 correlation”  $w$  the (normalized) amount of total correlation  
101 that is not explained by the null model. We declare cell  
102 pairs with significant excess correlation to be “interacting,”  
103 likely due to specific recurrent neural circuitry. Because our  
104 approach explicitly discounts for correlations arising from over-  
105 lapping place fields and global modulation (e.g. due to locking  
106 to the underlying brain oscillations or influence of behavioral  
107 covariates such as running velocity), it differs from previous  
108 attempts to use correlations to probe the intrinsic network  
109 mechanisms (36).

110 We validated our detection method by constructing a syn-  
111 thetic dataset of spiking CA1 neurons whose responses were  
112 modulated by the position of an artificial agent and by an  
113 assumed network of interactions (see Methods). We ensured  
114 that the synthetic data matched the synchrony and the highly  
115 irregular occupancy observed in a real 20-minute exploration  
116 session. Interactions identified by our method strongly overlap  
117 with the ground truth, as measured by the area under the  
118 receiver operating characteristic (Fig. 1B). The inferred excess  
119 correlations were well aligned with the ground truth (Fig. S1A).  
120 We did not find any tendency of cells that are more (or less) sim-  
121 ilarly tuned to show higher (or lower) inferred  $w_{ij}$ s (Fig. S1B).

122 We next analyzed CA1 tetrode recordings of six rats explor-  
123 ing familiar and novel 2D environments separated by a short  
124 period of rest (Fig. 1C) (37, 38). Putative units were filtered  
125 by using several clustering quality measures (39–41) to ensure  
126 that they were well isolated (Fig. 1D, see Methods). To avoid  
127 confounds due to changes in firing rate, we retained only cells  
128 active in both environments ( $> 0.25$  spike/sec) (14). Consider-  
129 ing only pairs of cells recorded on different tetrodes, our final  
130 dataset includes a total of 9511 excitatory-excitatory (EE),  
131 7848 excitatory-inhibitory (EI), and 1612 inhibitory-inhibitory  
132 (II) pairs. We detected both positive and negative excess  
133 correlations among cell pairs (Fig. 1E,F). Interestingly, cell  
134 pairs with negative excess correlation can have positive total  
135 correlation (Fig. 1F), corroborating the idea that the network  
136 circuitry can strongly affect coordinated spiking activity in  
137 the hippocampus.

138 **Interaction networks in familiar and novel environments.**  
139 What is the structure of the inferred interaction network?  
140 We set the threshold to declare a cell pair as interacting at

$|w| > 4.5$  (corresponding to a p-value cut of  $p = 0.05$  prior to  
Bonferroni correction for multiple comparisons; see Methods).  
We first report a generally sparse interaction network in the  
excitatory-excitatory (EE) subnetwork, with  $\sim 5\%$  of analyzed  
pairs showing significant interaction; this coincidentally implies  
that our null model accounts for most of the observed correla-  
tion structure. The fraction of interactions is larger among  
excitatory-inhibitory (EI) cell pairs, where, as expected, nega-  
tive interactions dominate; the fraction is highest at  $\sim 30\%$   
among positive interactions in the inhibitory-inhibitory (II)  
subnetwork (Fig. 2A).

We next focused on interaction changes induced by a switch  
from familiar to novel environment (Fig. 2A). We observed  
a significant increase in EE interactions, possibly due to de-  
creased inhibition during novelty (15, 17), which enhances  
learning and promotes plasticity (42–44). We indeed found  
putative inhibitory cells to be less synchronous and slightly  
less active in novel environments (Fig. S2B,D), in line with  
previous findings (16), while excitatory neurons were more  
synchronous but did not differ in terms of their average fir-  
ing rates (Fig. S2A,C). Circuit modifications during spatial  
learning are known to originate in altered spike transmission  
among connected excitatory and inhibitory neurons (45, 46).  
Consistent with this, we found an increase in positive EI inter-  
actions, while their negative counterpart remained unchanged.  
This increase could not be attributed to increased reliability  
of monosynaptic EI connections (Fig. S3), especially since cell  
pairs on the same tetrode were excluded (47). We did not  
observe significant changes in the number of II interactions.

How conserved are individual network interactions across  
consecutive environments? The largest overlap in detected  
interactions was found in the II subnetwork, where 77.5% of  
interactions were preserved, preferentially among cell pairs  
with similar theta sensitivity (Fig. S4D; (48)). EI interac-  
tions, especially inhibitory, also showed substantial overlap  
(31.1%); the correlation with theta selectivity was small but  
significant (Fig. S4D). The overlap was weakest (16.8%) in  
the EE subnetwork; no correlation with theta selectivity was  
observed (Fig. S4D).

All reported overlaps were statistically significant under  
a permutation test (1000 random shuffles of cell labels;  $p <$   
 $10^{-3}$  for all subnetworks). Significance was confirmed by  
comparing the Jaccard similarity of the adjacency matrices of  
familiar and novel subnetworks against the null distributions  
constructed from Erdos-Renyi graphs with matched numbers  
of vertices and edges (1000 ER graphs;  $p < 10^{-3}$  for II and EI  
subnetworks,  $p = 0.009$  for EE).

The similarity of interaction networks across the two en-  
vironments extends beyond the binary presence / absence of  
significant interactions. Figure 2B compares the strength of  
excess correlations,  $w$ , in familiar vs novel environment for EE,  
EI, and II cell pairs. For all subnetworks,  $w$  are significantly  
correlated across the two environments, with the reported  
correlation strength related to the network overlap (Fig. 2A).  
Taken together, these findings corroborate the idea that hip-  
pocampal remapping across environments is not random (49),  
also at the level of cell-cell interactions.

Because spatial information is encoded predominantly by  
pyramidal cells (50, 51), we analyzed the EE subnetwork in  
detail (Fig. 2C). Our key statistical observation is shown in  
Fig. 2D: interaction probability increases nonlinearly with

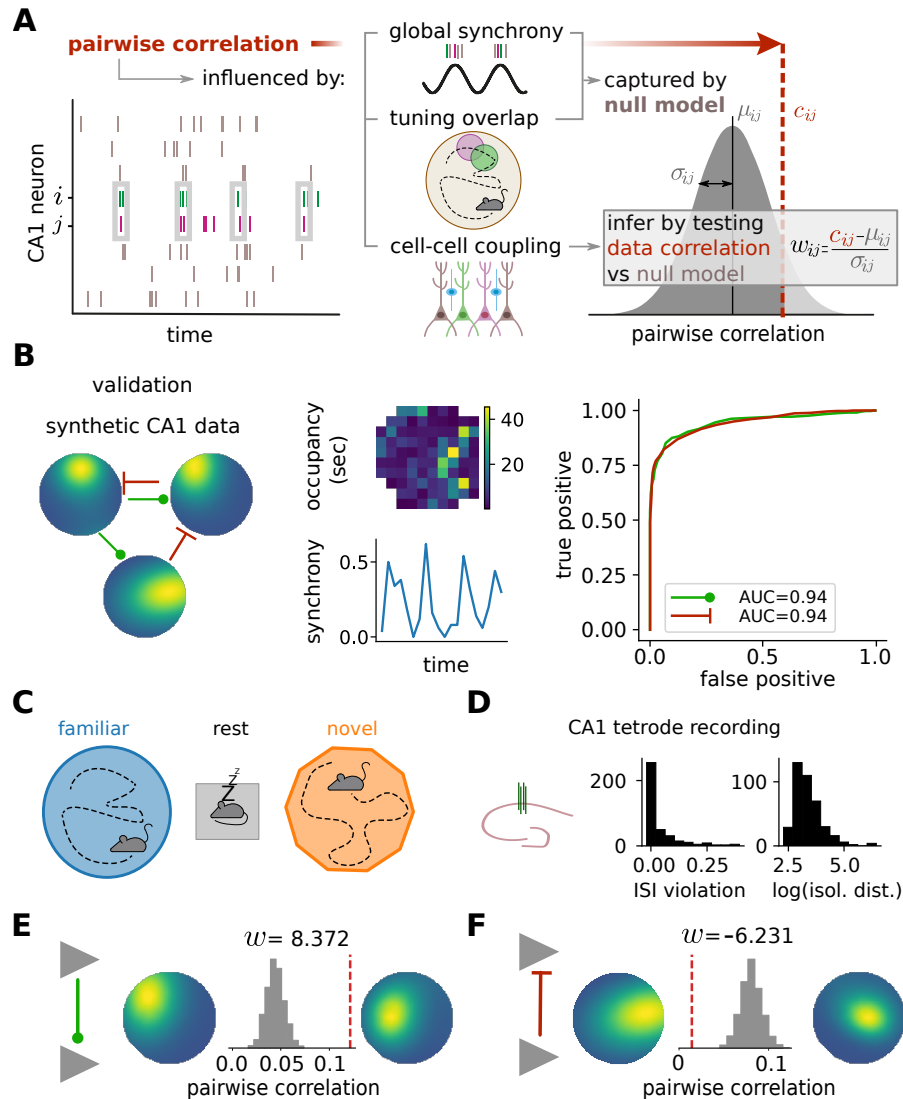

**Figure 1. Detecting network interactions among hippocampal CA1 cells.** (A) Method schematic. A null model for population responses takes into account the inferred place field tuning of each cell and the moment-to-moment global synchrony, but is otherwise maximally unstructured. For each cell pair, this model predicts a null distribution for (total) pairwise correlation (gray distribution), which is compared to the correlation estimate from data (dashed red line). The normalized discrepancy between the data correlation  $c_{ij}$  and the null model expectation  $\mu_{ij}$  for a pair of neurons  $(i, j)$  is referred to as “excess correlation”,  $w_{ij}$ , and serves as a proxy for direct cell-cell interaction. (B) Method validation on synthetic data. Detection accuracy is assessed using simulated data with known interactions (left), which matches real data with respect to spatial occupancy (top, middle) and observed synchrony indices (bottom, middle), for an example 20-minute exploration session. Receiver-operator characteristic (ROC) shows the probability of correctly detecting positive (green) and negative (red) interactions for different detection thresholds (right). (C) Experimental paradigm. Animals explore a familiar environment, then rest in a sleep box, after which they explore a novel environment (20–40 minutes for each condition). (D) Neural recordings. Left: neural activity was recorded using tetrodes implanted in the dorsal CA1 area of the hippocampus. Middle: distribution of ISI violation scores after spike sorting for the data included in the analysis. Right: same for the Isolation Distance measure. (E,F) Example pair of pyramidal cells with significant positive (E) and negative (F) excess correlation  $w$  (gray histogram – distribution of correlation coefficients derived from the null model; red dashed line – measured raw pairwise correlation).

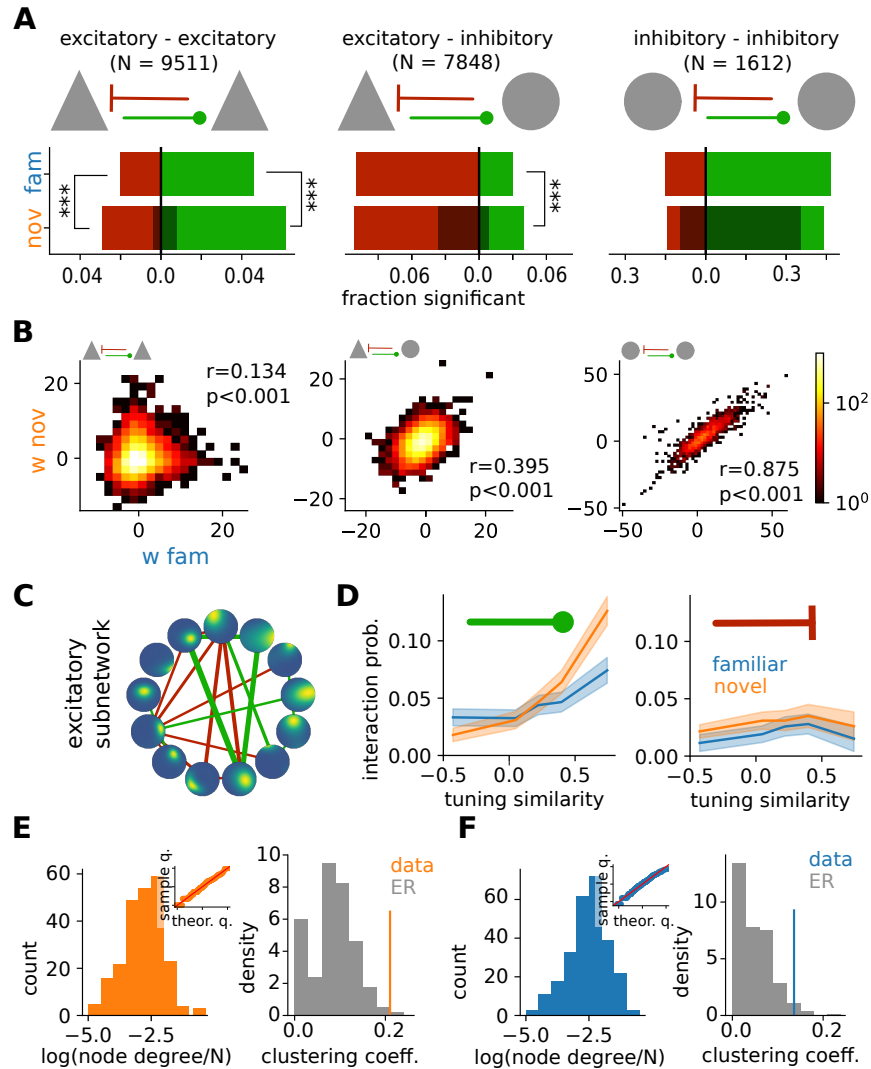

**Figure 2. Network interactions in familiar and novel environments.** (A) Summary of cell-cell interaction results for different cell types (triangle – pyramidal cell, circle – putative interneuron), positive (green) and negative (red) excess correlations, for both the familiar (top row, blue) and the novel (bottom row, orange) environment (stars – significant difference under binomial test at  $p < 0.001$ ). Shaded regions mark the fraction of interactions detected in the familiar environment that remain in the novel environment. (B) Paired comparison (colormap – pair density) between excess correlations  $w_{ij}$  detected in familiar vs. novel environment. (C) Example of an estimated excitatory subnetwork. Circles show the place field selectivity of each neuron, with edges showing significant cell-cell interactions (green – positive; red – negative excess correlations); line thickness corresponds to interaction strength. (D) Left: interaction probability in the excitatory subnetwork increases with place field overlap (“tuning similarity”) for positive interactions (blue – familiar environment; orange – novel environment; shaded area – 99th percentile confidence interval for the mean). Right: analogous plot for negative interactions. (E) Left: distribution of  $\log$  node-degree of E cells normalized by the total number of E cells in each session, for the novel environment. Inset: quantile-quantile plot comparing this distribution to the normal expectation. Right: excitatory subnetwork has a significantly higher clustering coefficient (orange line – data) compared to the expected distribution for an Erdos-Renyi (ER) network with a matched connection density. (F) Same as (E), but for the familiar environment.



place field overlap for positive interactions, and is roughly constant for negative interactions. In the novel environment, the excitatory interaction probability increases  $\sim 3$ -fold over the observed range of place field overlap. In the familiar environment, the modulation with place field overlap is less pronounced, possibly indicating a shift towards a more decorrelated representation of space (14).

We further characterized the topology of familiar and novel excitatory networks. The node degree appears to be log-normally distributed in both environments, with clustering coefficients that are significantly higher than expected from matched Erdos-Renyi graphs (Fig. 2E,F). This effect was more pronounced during novelty (Fig. S5A), in line with recent reports (36). Accordingly, interacting excitatory triplets were over-represented, more strongly so in the novel environment (Fig. S5C). Finally, we found a linear relationship between the log-number of nodes and the shortest path length (Fig. S5B), which is a strong fingerprint of small-world networks (52).

**Effects of network interactions on spatial coding.** To explore how the network structure affects spatial information encoding at the population level, we constructed a statistical model of interacting excitatory cells responding to spatial inputs (Fig. 3A). Our model, a version of pairwise-coupled, stimulus-driven maximum entropy distribution over binary spiking units (see Methods, (53)) allows us to vary cell-cell excess correlations (to study the effect of network topology and interaction strength) as well as the strength of the spatial inputs (to study the effect of novel vs familiar environment), while maintaining a fixed average firing rate in the population. For tractability, we simulated populations of 50 place cells. Our model is thus not an exact fit to data or at-scale model of the real hippocampal population; rather, we are looking for qualitative yet clear signatures of spatial coding at the population level that could be compared between the data and the model.

Using this setup, we contrasted spatial coding in two networks which were identical in every respect except for their excess correlations pattern. Interactions in the “structured” network followed the relationship between place field overlap and excess correlation  $w$  observed in real data; interactions in the “random” network were drawn from the same data-derived distribution for  $w$ , but did not follow the relationship with place field overlap (Fig. 3A). For each of the two choices, we further simulated the effects of familiar vs. novel environment by adjusting the strength of the feed-forward spatial input: in our model, higher input strength corresponds to higher signal-to-noise ratio for the spatial drive, which is why we refer to this parameter as “input quality”. We adjusted the input quality to best resemble various marginal statistics (spatial information, place field sparsity, peak-over-mean firing values; see Methods and Fig. S6) in familiar and novel environments measured on data.

We quantified the coding performance of our networks by estimating the mutual information between population activity and location and by estimating the average decoding error. As expected, higher input quality in the familiar environment leads to overall higher information values (Fig. 3B) and lower decoder error (Fig. S7B). Less trivial are the effects of network connectivity: in both environments, structured (data-like) interactions significantly outperform random ones, with larger improvements seen in the novel environment. This suggests

that network interactions among hippocampal cells adjust to maintain a high-fidelity spatial representation even when they receive lower quality, noisy inputs.

Do the structured interactions better predict other population-level aspects of the real hippocampal code relative to random ones? First, we assessed the importance of pairwise (co-firing) statistics for the decoding performance, highlighted by previous work (10). For the random network, the decoding performance improvement with co-firing statistics relative to population-vector decoding is small and comparable in novel vs familiar environment. In contrast, for the structured network and data, the improvement is significantly larger in the novel environment (Fig. 3C); the improvement reaches three-fold in novel relative to the familiar environment on real data, perhaps due to the larger population size.

Second, we assessed the effective dimensionality of the population responses to random pairs of stimuli, by measuring the fraction of variance explained by the first principal component of the relevant activity patterns (Fig. 3D). For the random network in the novel environment, this fraction is two-fold lower than in the familiar environment. In contrast, for the structured network and data, the fraction is about 0.1 regardless of the environment. Stronger and structured interactions appear to organize neural responses in the novel environment so that the code maintains a collective correlated response even when the input drive is weak.

Third, we assessed the linear separability of spatial positions based on neural population responses, a task putatively carried out by downstream brain areas. For the random network, the performance of a linear classifier trained to discriminate random positions is significantly worse in the novel environment. In contrast, the performance is restored to a high value ( $\sim 0.9$ ) irrespective of the environment by data-like interactions in the structured model, matching observations on real data (see Fig. S8 for separability of positions as a function of their mutual distance).

Taken together, our results suggest an important coding role for the interaction patterns inferred in Fig. 2D and the corresponding “structured” networks explored in Fig. 3. In comparison to the random network, the data-like, structured network (i) encodes more information about position even when the input is of low quality; (ii) this information can be retrieved by utilizing co-firing statistics of multiple cells; (iii) selected collective statistics of place cell activity remain constant under change of environment. Consistent conclusions hold for the comparison between the data-like, structured network and an uncoupled population (Fig. S7).

**CA1 interactions match predictions of an optimal coding model.** While Figure 3 suggests that interactions between cells self-organize to improve spatial information coding relative to a random or an unconnected (Fig. S7) network, it is not clear whether the observed organization is in any sense optimal. To address this question, we numerically optimized cell-cell interactions among a population of place cells, so as to maximize the mutual information between the population activity and spatial position (Fig. 4A). In essence, this amounts to finding “efficient coding” solutions for network structure given inputs to individual cells that are correlated due to place field overlaps (29). As before, an important control parameter is the overall magnitude (quality) of the input drive,  $h$ , which we now vary parametrically. Resource constraints were sim-

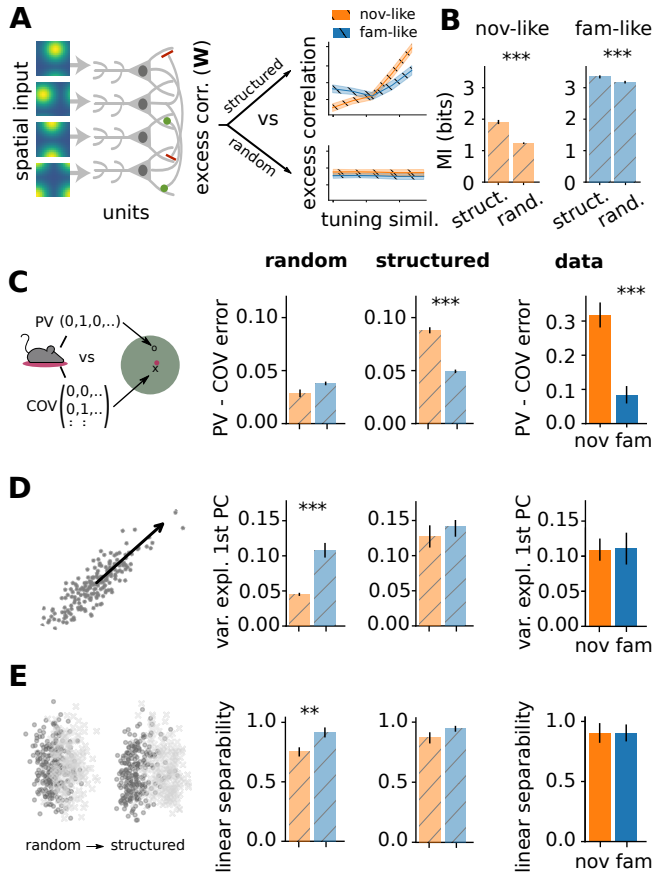

**Figure 3. Effects of network interactions on spatial encoding.** (A) A schematic of the circuit model with variable excess correlations (see Methods). Two connectivities are compared: “structured” (mimicking the inferred excess correlation vs tuning similarity relationship) vs. “random”. (B) Estimated spatial information (MI; error bar – 99-th percentile CI for the mean) using structured and random interactions, in the novel-like and familiar-like scenario (see text). Structured interactions significantly increase the spatial information ( $p < 0.001$  (\*\*\*) or  $p < 0.01$  (\*\*)) under a non-parametric Mann–Whitney U-test). (C) Improvement in decoding performance by taking into account co-variability of cells (“COV” decoder) relative to a simple population vector (“PV”) decoder, evaluated on  $4 \cdot 10^4$  samples). The improvement is significantly higher in the novel environment on structured network and on real data, but not on the random network (error bars and significance tests as in B). (D) Fraction of variance explained by the first principal component of population vectors for  $10^3$  random pairs of locations in the maze. The fraction is unchanged between the novel and familiar environments on structured network and on real data, but differs significantly on the random network (error bars and significance tests as in B). (E) Linear separability measured as SVM classification accuracy of random pairs of stimuli (trained on 1000 pairs of same vs. different positions). The separability is unchanged between the novel and familiar environments on structured network and on real data, but differs significantly on the random network.

ulated by constraining the optimization to keep the global firing rate constant and the possible couplings bounded in  $|W_{ij}| \leq w_{\max} = 1$  (see Methods).

As the input quality increases, the information gain due to optimal interactions decreases, indicating that optimization benefits novel environments (with noisy spatial inputs) more than familiar environments (with reliable spatial inputs) (Fig. 4B). We further find that an overlap in tuning similarity between two cells correlates with optimal pairwise interaction between them when input quality is low, but this correlation grows weaker with increasing input quality (Fig. 4C), consistent with theoretical expectation (29).

Does optimization predict a clear relationship between the tuning similarity and interaction strength for pairs of cells? Figure 4D shows two such relationships, for high and low input quality, predicted *ab initio* by maximizing spatial information. The optimal relationships closely resemble two analogous curves, for the familiar and novel environment, inferred from data (Fig. 4E). A similar resemblance is not observed if one maximizes spatial information carried by individual cells (Fig. S9), highlighting the importance of information coding at the population, not individual-cell, level.

As an alternative comparison to experiment we also studied the proportion of optimized couplings that reached maximal allowable strength (Fig. 4F; Fig. S10). In the data, cells are declared as interacting when their excess correlation exceeds a threshold, and so Fig. 2D represents a direct counterpart to our theoretical prediction. We observe a clear qualitative match that includes the decrease in proportion of strong couplings for familiar environments (Fig. S10). We further observe that the proportion of optimal couplings reaching the constraint  $w_{\max}$  scales nonlinearly with the tuning similarity, as in the data; the shape of the nonlinearity depends on the imposed  $w_{\max}$  (Fig. S11).

Even though our simulations use a coarse-grained and down-scaled model of a real neural population (precluding exact comparisons), we observe an excellent qualitative match between theoretical predictions and the data. Taken together, this opens up an intriguing possibility that network interactions in the hippocampus dynamically adapt to new environments so as to maximize the fidelity of population-level representation.

**Central role for the nonlinear dependence of connectivity on tuning.** So far, our analysis of data as well as of optimized networks has identified a consistent pattern: the nonlinear dependence of interaction probability on tuning similarity (Fig. 2D; 4F). Figure 3 further showed that the pattern is necessary, since coding benefits were absent in randomized networks. The key remaining question is whether the observed connectivity pattern is not only necessary, but also sufficient to convey spatial coding benefits and generate networks of a particular topology.

To address this question, we generated model networks of 50 place cells, as before, but limited their connection strengths to three possible values,  $\{-J, 0, +J\}$ , where  $J \in [0, 1]$  could be varied parametrically. We now used the interaction pattern of Fig. 2D as an actual *connectivity rule*: we selected 6% of pairs (as in data) to have a positive connection  $+J$  and connected them according to their tuning similarity as in data (Fig. 5A, “data-like”). To assess the role of the nonlinearity, we compared this with networks where the connection probability was

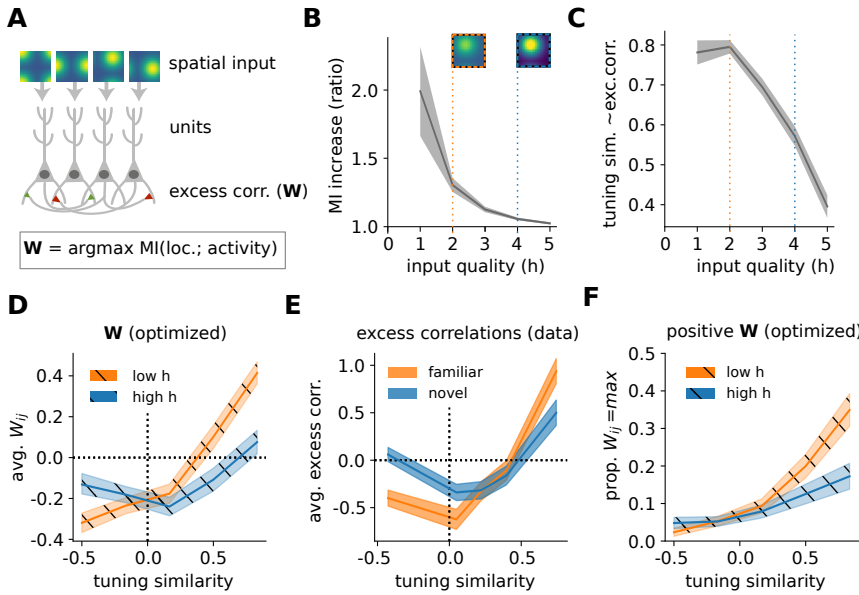

**Figure 4. Predicted optimal network interactions.** (A) A schematic of the circuit model. Individual neurons, which receive spatially tuned inputs (with overall strength controlled by parameter  $h$ ), are pairwise connected with interactions  $W$ ; interactions are numerically optimized to maximize the mutual information between spatial position and population responses while constraining population mean firing rates and  $|W_{ij}| \leq w_{\max}$  (here,  $w_{\max} = 1$ ). (B) Average ratio between mutual information (MI) in optimized vs non-interacting ( $W = 0$ ) networks. Dashed vertical lines denote two chosen input quality levels, together with firing rate map of an example cell (“low quality”  $h = 2$ , orange, resembling novel environment; “high quality”  $h = 4$ , blue, resembling familiar environment). In all simulation plots we show averages over 1000 replicate optimizations with random initial assignments of place fields (see Methods); shaded area – 95th percentile CI for the mean. (C) Average alignment (Spearman’s correlation) between pairwise input similarity and optimal  $W_{ij}$  as a function of input quality. (D) Average magnitude of optimal  $W_{ij}$  as a function of tuning similarity for the two environments. (E) Same as E, computed using the excitatory-excitatory excess correlations  $w_{ij}$  estimated from data. Note the vertical scale difference between (D) and (E): excess correlations  $w_{ij}$  are a statistical proxy for the true interactions  $W$ ; the two are expected to be correlated but not identical (cf. Fig. S1A). (F) Proportion of optimal  $W_{ij} = w_{\max} = 1$  as a function of tuning similarity.

385 linear in tuning similarity (“linear”) or where it was constant  
 386 (“random”). In each of the three cases, a randomly chosen  
 387 3% of the place cell pairs (as in data) were connected with a  
 388 negative strength,  $-J$ . As before, we fixed the average firing  
 389 rate, and considered two levels of input quality, mimicking the  
 390 familiar and novel environments (see Methods). This setup  
 391 removed all structure (specifically, by making all connections  
 392 have the same magnitude) except for that generated by the  
 393 connectivity rule, allowing us to test for sufficiency.

394 First, we find that the data-like connectivity rule consistently  
 395 improves mutual information between the population  
 396 responses and position for increasing  $J$ , especially for novel-  
 397 like input quality (Fig. 5B). This improvement is larger for the  
 398 nonlinear, data-like connectivity than for the linear one. Figure  
 399 S13 further suggests that connectivity alone accounts for  
 400 a large fraction of mutual information gain, without the need  
 401 for the fine-tuning of the interaction strengths. The data-like  
 402 connectivity rule also improves the performance of a simple  
 403 population vector decoder relative to random connectivity, in  
 404 stark contrast to the linear dependence, which performs worse  
 405 than the random one (Fig. 5E).

406 Finally, we asked whether different connectivity rules leave  
 407 a strong signature on the network topology (Fig. 5D). To  
 408 this end, we randomly generated 1000 networks according  
 409 to the three different rules (Fig. 5A). The average clustering  
 410 coefficient was substantially higher in networks created using  
 411 the data-like rule (Fig. 5E) compared to both the random  
 412 and linear connectivity rules, without significantly affecting  
 413 the distribution of incident edges (Fig. S12A) or the average  
 414 shortest path length (Fig. 5F). Additional analysis on the  
 415 clique-complexes of the connectivity graphs revealed that the  
 416 1D Betti numbers are significantly smaller for the synthetic  
 417 networks generated using the data-like rule, and comparable  
 418 with the data-derived networks (Fig. S12C). These analyses  
 419 are consistent with the overexpression of triangles (Fig. S5)  
 420 and high clustering coefficients (Fig. 2E) observed in the data-  
 421 derived network. Taken together, the nonlinear, data-like  
 422 connectivity rule appears sufficient to generate small-world

topologies matching data across a broad panel of network  
 metrics.

## Discussion

425  
 426 Statistical challenges limit our understanding of how experi-  
 427 ence shapes interactions and, consequently, information coding  
 428 in a local neural circuit during animal-driven behavior. While  
 429 the idea of analyzing pairwise correlations as a window into  
 430 network interactions is not new (54–56), the statistical prob-  
 431 lem of separating local network interactions from other factors  
 432 that drive neural correlations has remained unsolved. Previous  
 433 approaches based on stimulus-averaged correlations (57), shuf-  
 434 fles (58) or GLM model fits (59) each suffer from statistical  
 435 limitations (in terms of sample efficiency, strong stationarity  
 436 or other model assumptions) which limit their general applica-  
 437 bility. For this reason, most analyses of hippocampal collective  
 438 behavior rely on total correlations (36, 60). Unfortunately,  
 439 these conflate changes in coding and changes in behavior: even  
 440 if the representation does not change at all, a change in the  
 441 animal’s behavior (e.g. with experience) would be sufficient to  
 442 change collective interactions defined based on total correla-  
 443 tions. Furthermore, well documented theta oscillations, which  
 444 arise from an interplay between medial septum inputs and  
 445 hippocampal subcircuits (32), as well as the animal’s speed,  
 446 which is known to substantially influence global hippocampal  
 447 activity (61, 62), can increase global synchrony and introduce  
 448 spurious correlations. It is only by factoring out all these  
 449 known sources of covariability, compactly captured by spike  
 450 synchrony (35), that the fine structure of pairwise cell inter-  
 451 actions can be revealed. To reliably detect such interactions,  
 452 we developed a novel statistical test rooted in the maximum  
 453 entropy framework (34).

454 When applying our detection method to tetrode recordings  
 455 of hundreds of isolated units in dorsal hippocampus of freely  
 456 behaving rats (37, 38), we found stark differences between  
 457 familiar and novel environments, especially in the EE subnet-  
 458 work. In particular, we found increased interactions among



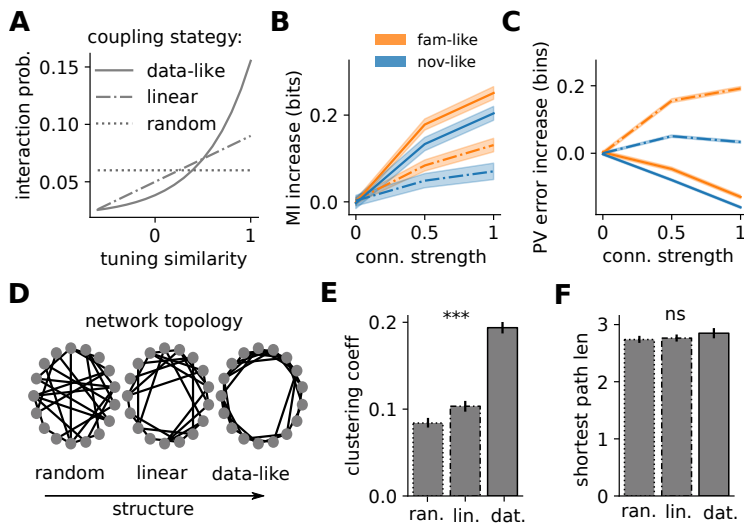

**Figure 5. Data-like interaction pattern is sufficient to generate small-world networks with improved spatial coding properties.** (A) Connectivity rules for positive connections in a simulated place cell network with 50 units. (B) Mutual information (MI) increase for data-like (solid) and linear (dashed) connectivity rule relative to the random connectivity, for familiar-like (blue) and novel-like (orange) quality input. Shaded areas show the 95th percentile confidence interval for the mean. (C) Average decoding error increase for data-like (solid) and linear (dashed) connectivity rule relative to random connectivity. (D) Example network topologies obtained by using different connectivity rules from (A). Nearby nodes have high tuning similarity. (E) Average clustering coefficient for the three connectivity rules from A (error bars – standard error; significance – 1-way ANOVA test,  $p < 0.001$  for \*\*\*, or n.s. for  $p > 0.05$ ). (F) Average shortest path length for the three connectivity rules from A (statistics as in E).

459 putative pyramidal neurons in novel environments. Further-  
 460 more, we detected increased interactions between excitatory  
 461 and inhibitory cells in novel environments. This effect was not  
 462 explained by higher reliability of direct excitatory-inhibitory  
 463 connections (47). It has long been known that inhibition is  
 464 generally weaker in a novel vs. a familiar environment (15–  
 465 17), which has been interpreted as a potential mechanism for  
 466 enhancing learning by promoting synaptic plasticity in excita-  
 467 tory neurons (15, 43). Nonetheless, given that the null models  
 468 capture both single cell average activity and population syn-  
 469 chrony for each environment separately, it is unlikely that this  
 470 observation can directly account for our results. Instead, our  
 471 observations in the novel environment are likely to derive from  
 472 an increased excitability at the dendritic level of pyramidal  
 473 cells, an effect that has been observed experimentally (63)  
 474 and has theoretically been shown as necessary for place field  
 475 formation and stabilization (19).

476 Our key statistical observation could be distilled into one  
 477 simple principle: a monotonic nonlinear dependence of the  
 478 interaction probability on place field overlap for positive inter-  
 479 actions among excitatory cells. This effect was observed  
 480 across experience, but was more prominent during novelty. We  
 481 analysed the neural coding implications of the inferred inter-  
 482 action structure using stimulus-dependent pairwise maximum  
 483 entropy models (53). We found that data-like interactions  
 484 offered improvements in spatial information content and decod-  
 485 ing. Coding advantages were higher during novelty: this  
 486 observation argues for a mechanism employed by CA1 net-  
 487 works to cope with worse quality input from CA3 (13) and  
 488 MEC (20, 21) during novelty. We also found that data-like  
 489 interactions improved stimulus discriminability, corroborating  
 490 previous findings (30). Moreover, our results explain why  
 491 disrupting correlations between hippocampal neurons leads to  
 492 decreased decoding accuracy (10).

493 Efficient coding in the place cell network yields optimal  
 494 solutions in which similarly tuned neurons have a higher prob-  
 495 ability of interacting positively. This is especially prominent  
 496 for lower-quality inputs in the novel environment, where the  
 497 predicted relation between interaction probability and tuning  
 498 similarity is clearly nonlinear, as observed in data. Simulated  
 499 networks where this observed relationship is elevated to an  
 500 actual connectivity rule show that, (i), the observed relation-

ship is sufficient to improve population spatial coding, and  
 (ii), the resulting network topology shows clear small-world  
 fingerprints (52, 64). While our results point towards small-  
 worldness as one consequence of the particular connectivity  
 rule that may be employed in the hippocampus (65), they do  
 not provide any evidence that small-world networks have in-  
 trinsic coding benefits *per se* (66, 67). Further work is needed  
 to clarify the relationship between coding and small-worldness  
 and to experimentally probe whether small-world architecture  
 is common in networks that need to process noisy inputs.

Even though inferred pairwise interactions do not neces-  
 sarily reflect underlying synaptic connectivity directly (68),  
 together with the neuron tuning function they offer an accu-  
 rate statistical description of a neural population out-  
 put (11, 69, 70). Moreover, pairwise interactions can be studied  
 using well established tools from information theory, which  
 critically rely on the differentiation between stimulus selectiv-  
 ity overlap and network interactions to assess the amount of  
 information that a population carries about a stimulus (29).  
 We derived and tested the efficient coding hypothesis for a  
 network of interacting place cells, by maximizing the mutual  
 information between the animal’s location (the stimulus) and  
 the population response, while holding individual cell tuning  
 and overall firing rate fixed. We found that network interac-  
 tions adapt to different levels of input quality by employing  
 different interaction vs. tuning similarity strategies. In par-  
 ticular, for low input quality (i.e., at low signal-to-noise ratio  
 mimicking the novel environment) optimal network interac-  
 tions are strongly aligned with the tuning similarity of the  
 interacting cells. When input quality is higher (i.e., at higher  
 signal-to-noise ratio mimicking the familiar environment), this  
 relation weakens yet remains detectable. These optimality  
 predictions closely resemble the data, suggesting that the CA1  
 circuit is close to an optimal operating regime across experi-  
 ence. As far as we know, this study is the first empirical test  
 of the efficient coding hypothesis applied to network interactions,  
 as proposed by previous theoretical work (29).

Theory predicts the inversion of the relative contribution  
 of optimal interaction and tuning at very high signal-to-noise  
 ratios (29). This causes the neural population to decorrelate  
 its inputs, a regime that is characteristic for coding in the  
 sensory periphery. While our numerical simulations reproduce



543 this decorrelation regime of efficient coding at very high signal-  
544 to-noise ratio inputs, our inferences and data analyses suggest  
545 that it is not relevant for the hippocampal place code. This is  
546 likely because the overall noise levels are higher in the spatial  
547 navigation circuits compared to the sensory periphery, and  
548 partially because of the intrinsic differences in the statistics of  
549 the signal to be encoded (position vs. natural images). Further  
550 work is needed to quantitatively relate the experimentally  
551 measured noise in CA1 inputs and responses to the effective  
552 “input quality” parameter that enters our predictions.

553 Are there previous reports where efficient coding predictions  
554 do not lead to decorrelation? A classic analysis in the retina  
555 correctly predicted that the receptive fields should lose their  
556 surrounds and switch to spatial averaging at low light (71). A  
557 detailed study of retinal mosaics suggested that even during  
558 day vision receptive field centers of ganglion cells should (and  
559 do) overlap, increasingly so as the noise increases, leading  
560 to a residual redundancy in the population code (72, 73), as  
561 reported (74). These findings support a more nuanced view  
562 of retinal coding (75) than the initial redundancy reduction  
563 hypothesis (76), precisely because they take into account the  
564 consequences of noise in the input and circuit processing (77–  
565 79). A recent study in fly vision focused on an interaction  
566 between two identified neurons, to find that its magnitude  
567 increased as the visual input became more and more noisy,  
568 as theoretically predicted by information maximization (80).  
569 Psychophysics of texture sensitivity that arises downstream of  
570 the primary visual cortex further suggested that the relevant  
571 neural mechanisms operate according to the efficient coding  
572 hypothesis, yet in the input-noise-dominated regime where  
573 decorrelation is not optimal (81). In light of these examples  
574 and our results, efficient coding—understood more broadly  
575 as information maximization (82) rather than solely in its  
576 noiseless decorrelating limit—should be revisited as a viable  
577 candidate theory for representations in the central brain. More  
578 generally, our approach enables a synergistic interplay between  
579 statistical analysis, information theory, graph theory and tra-  
580 ditional neural coding, and opens new ways for investigating  
581 neural coding during complex/naturalistic behavior in other  
582 systems.

## 583 Materials and Methods

### 584 A. Experimental procedures.

586 **Datasets and Subjects.** We analyzed data from two previously pub-  
587 lished datasets (37, 38). All procedures involving experimental  
588 animals were carried out in accordance with Austrian animal law  
589 (Austrian federal law for experiments with live animals) under a  
590 project license approved by the Austrian Federal Science Ministry.  
591 Four adult male Long-Evans rats (Janvier, St-Isle, France) were  
592 used for the experiments in (38). We used two wildtype littermate  
593 control animals, generated by breeding two DISC1 heterozygous  
594 Sprague Dawley rats from (37). Rats were housed individually in  
595 standard rodent cages (56X40X26 cm) in a temperature and humid-  
596 ity controlled animal room. All rats were maintained on a 12 hr  
597 light/dark cycle and all testing performed during the light phase.  
598 Food and water were available *ad libitum* prior to the recording  
599 procedures and bodyweight at the time of surgery was 300–375 g.

600 **Surgery.** The first 4 animals (38) were implanted with microdrives  
601 housing 32 (2x16) independently movable tetrodes targeting the  
602 dorsal CA1 region of the hippocampus bilaterally. Each tetrode was  
603 fabricated out of four 10  $\mu$ m tungsten wires (H-Formvar insulation  
604 with Butyral bond coat California Fine Wire Company, Grover

605 Beach, CA) that were twisted and then heated to bind them into  
606 a single bundle. The tips of the tetrodes were then gold-plated to  
607 reduce the impedance to 200–400 k $\Omega$ . During surgery, the animal  
608 was under deep anesthesia using isoflurane (0.5%–3% MAC), oxygen  
609 (1–2l/min), and an initial injection of buprenorphine (0.1mg/kg).  
610 Two rectangular craniotomies were drilled at relative to bregma  
611 (centered at AP = -3.2; ML =  $\pm$ 1.6), the dura mater removed and  
612 the electrode bundles implanted into the superficial layers of the  
613 neocortex, after which both the exposed cortex and the electrode  
614 shanks were sealed with paraffin wax. Five to six anchoring screws  
615 were fixed on to the skull and two ground screws (M1.4) were  
616 positioned above the cerebellum. After removal of the dura, the  
617 tetrodes were initially implanted at a depth of 1–1.5 mm relative  
618 to the brain surface. Finally, the micro-drive was anchored to the skull  
619 and screws with dental cement (Refobacin Bone Cement R, Biomet,  
620 IN, USA). Two hours before the end of the surgery the animal was  
621 given the analgesic Metacam (5mg/kg). After a one-week recovery  
622 period, tetrodes were gradually moved into the dorsal CA1 cell layer  
623 (stratum pyramidale).

624 The last two animals (37) were implanted with microdrives  
625 housing 16 independently movable tetrodes targeting the right  
626 dorsal CA1 region of the hippocampus. Each tetrode was fabricated  
627 out of four 12  $\mu$ m tungsten wires (California Fine Wire Company,  
628 Grover Beach, CA) that were twisted and then heated to bind into  
629 a single bundle. The tips of the tetrodes were gold-plated to reduce  
630 the impedance to 300–450 k $\Omega$ . During surgery, the animal was under  
631 deep anesthesia using isoflurane (0.5–3%), oxygen (1–2 L/min), and  
632 an initial injection of buprenorphine (0.1 mg/kg). A rectangular  
633 craniotomy was drilled at -3.4 to -5 mm AP and -1.6 to -3.6 mm  
634 ML relative to bregma. Five to six anchoring screws were fixed  
635 onto the skull and two ground screws were positioned above the  
636 cerebellum. After removal of the dura, the tetrodes were initially  
637 implanted at a depth of 1–1.5 mm relative to the brain surface.  
638 Finally, the microdrive was anchored to the skull and screws with  
639 dental cement. Two hours before the end of surgery the analgesic  
640 Metacam (5 mg/kg) was given. After a one-week recovery period,  
641 tetrodes were gradually moved into the dorsal CA1 cell layer.

642 After completion of the experiments, the rats were deeply anes-  
643 thetized and perfused through the heart with 0.9% saline solution  
644 followed by a 4% buffered formalin phosphate solution for the his-  
645 tological verification of the electrode tracks.

646 **Behavioral procedures.** Each animal was handled and familiarized  
647 with the recording room and with the general procedures of data  
648 acquisition. For the first 4 animals (38), four to five days before  
649 the start of recording, animals were familiarized at least 30 min  
650 with a circular open-field environment (diameter = 120 cm). On  
651 the recording day, the animal underwent a behavioral protocol in  
652 the following order: exploration of the familiar circular open-field  
653 environment (40 mins), sleep/rest in rest box (diameter = 26cm,  
654 50 mins). Directly after this rest session the animals also explored  
655 a novel environment for an additional 40 min and rested after for  
656 50 mins. The novel environment recordings were performed in the  
657 same recording room but in an enclosure of a different geometric  
658 shape but similar size (e.g., a square environment of 100cm width).  
659 The wall of both the familiar and novel environment enclosures was  
660 30cm in height, which limited the ability of the animal to access  
661 distal room cues. In addition, in two animals a 50 mins sleep/rest  
662 session was performed before the familiar exploration.

663 For the last 2 animals (37), two to three days before the start  
664 of recording, animals were familiarized with a circular open-field  
665 environment (diameter = 80 cm). On the recording day, the animal  
666 underwent a behavioral protocol in the following order: 10 min rest-  
667 ing in a bin located next to the open-field environment, exploration  
668 of the familiar open-field environment (20 min), sleep/rest in the  
669 familiar open-field environment (20 min), exploration of a novel  
670 open-field environment (20 min), sleep/rest in the novel open-field  
671 environment (20 min). Whilst the familiar environment was kept  
672 constant, the novel environment differed on every recording day.  
673 The novel open-field arenas differed in their floor and wall linings,  
674 and shapes. The recordings for the familiar and novel conditions  
675 were performed in the same recording room.

676 During open-field exploration sessions, food pellets (MLab rodent  
677 tablet 12mg, TestDiet) were scattered on the floor to encourage  
678 foraging and therefore good coverage of the environment.

679 **Data Acquisition.** A headstage with 64 or 128 channels (4 X 32 or 2  
680 X 32 channels, Axona Ltd, St. Albans, UK) was used to preamplify  
681 the extracellular electric signals from the tetrodes.

682 Wide-band (0.4 Hz–5 kHz) recordings were taken and the ampli-  
683 fied local field potential and multiple-unit activity were continuously  
684 digitized at 24 kHz using a 128-channel (resp. 64-channels) data  
685 acquisition system (Axona Ltd St. Albans, UK). A small array  
686 of three light-emitting diode clusters mounted on the preamplifier  
687 headstage was used to track the location of the animal via an over-  
688 head video camera. The animal’s location was constantly monitored  
689 throughout the daily experiment. The data were analyzed offline.

## 690 B. Data Processing.

691 **Spike sorting.** The spike detection and sorting procedures were per-  
692 formed as previously described (83). Action potentials were ex-  
693 tracted by first computing power in the 800-9000 Hz range within a  
694 sliding window (12.8 ms). Action potentials with a power >5 SD  
695 from the baseline mean were selected and spike features were then  
696 extracted by using principal components analyses. The detected  
697 action potentials were segregated into putative multiple single units  
698 by using automatic clustering software (<http://klustakwik.sourceforge.net/>).  
699 These clusters were manually refined by a graphical  
700 cluster cutting program. Only units with clear refractory periods in  
701 their autocorrelation and well-defined cluster boundaries were used  
702 for further analysis. We further confirmed the quality of cluster  
703 separation by calculating the Mahalanobis distance between each  
704 pair of clusters (39). Afterwards, we also applied several other  
705 clustering quality measures and selected only cells which passed  
706 stringent measures. In particular we implemented: isolation distance  
707 and l-ratio (40), ISI violations (41) and contamination rate. We  
708 employed the code available on Github: <https://github.com/cortexlab/sortingQuality>. The criteria for the cells to be considered for  
709 analysis were the following:

- 711 • Isolation distance > 10–th percentile
- 712 • ISI violations < 0.5
- 713 • contamination rate < 90–th percentile

714 Periods of waking spatial exploration, immobility, and sleep were  
715 clustered together and the stability of the isolated clusters was ex-  
716 amined by visual inspection of the extracted features of the clusters  
717 over time. Putative pyramidal cells and putative interneurons in the  
718 CA1 region were discriminated by their autocorrelations, firing rate,  
719 and waveforms, as previously described (Csicsvari et al., 1999a).

720 **Data inclusion criteria.** We set a minimum firing rate of > 0.25 Hz  
721 on average, across both familiar and novel environments. The  
722 final dataset consisted of 294 putative excitatory and 128 putative  
723 inhibitory cells across 6 animals. Considering only pairs of units  
724 recorded on different tetrodes, the dataset includes a total of 9511  
725 excitatory-excitatory (EE) pairs, 7848 excitatory-inhibitory (EI)  
726 and 1612 inhibitory-inhibitory (II) pairs.

727 Spiking data was binned in 25.6 ms time windows, reflecting the  
728 sampling rate for positional information. We excluded bins where:

- 729 • the animal was static (speed < 3cm/s)
- 730 • sharp-wave ripple oscillatory activity was high, i.e. periods  
731 with power in the band 150 ~ 250 Hz in the top 5th percentile  
732 (83, 84)
- 733 • theta oscillatory activity was particularly low, with power in  
734 the band 5 ~ 15 Hz in the lowest 5th percentile; it is known  
735 that hippocampal theta oscillations support encoding of an  
736 animal’s position during spatial navigation and reduces overall  
737 synchrony of population (85, 86).

738 **Theta phase detection and data binning in theta cycles.** MN: we are  
739 not talking about this in the paper. Exclude?

## 740 C. Null model of population responses and detection of excess cor- 741 relations.

**Maximum entropy null model.** We construct a null model for popula-  
tion responses that takes into account the position of the animal,  
 $\mathbf{s}$  and the population synchrony,  $k = \sum_i x_i$ , but is otherwise max-  
imally variable. We use this model to generate a large ensemble  
of surrogate datasets, that match the data with respect to tuning  
but without additional noise correlations. Using these surrogates  
allow us to estimate an empirical distribution of (total) pairwise  
correlations under the null model, which we then compare to data.

Under the assumption that spike counts have mean  $\lambda(\mathbf{s}, k)$  with  
Poisson noise, the distribution of the joint neural responses under  
the null model factorizes as:

$$p_{ind}(\mathbf{x} | \mathbf{s}, K) = \prod_i \text{Poisson}(x_i | \lambda_i(\mathbf{s}, k)). \quad [1]$$

One important caveat is that the population synchrony depends on  
the neural responses themselves, which introduces the additional con-  
straint that  $k = \sum_i x_i$  for each of these surrogate draws, something  
that we enforce by rejection sampling (87). The only remaining step  
is to estimate the tuning function of each cell,  $\lambda_i(\mathbf{s}, k)$ , which we  
achieve using a nonparametric approach based on Gaussian Process  
(88) priors.

**Tuning function estimation.** Here we briefly describe the key steps  
of the approach, and refer the reader to (89) for further details.  
The data is given as  $T$  input pairs,  $\mathcal{D} = \{\mathbf{x}_i, y_i\}_{i=1,2,\dots,T}$ , where  $\mathbf{x}_i$   
denotes the input variables, defined on a 3–dimensional lattice for  
the 2d–position of the animal in the environment and population  
synchrony, defined as  $k = \frac{1}{T} \sum_{n=1}^T x_i^{(n)}$ ; and  $y_i$  denotes spike  
counts in the corresponding time bin ( $dt = 25.6\text{ms}$ ).

Neural activity is modeled as an inhomogeneous Poisson process  
with firing rate dependent on input variables,  $\lambda(\mathbf{x}_i)$ . We use a  
Gaussian Process (GP) prior to specify the assumption that the  
neuron’s tuning is a smooth function of the inputs, with an expo-  
nential link function,  $f = \log \lambda$ ,  $f \sim \mathcal{GP}(\mu, k)$ , with mean function  
 $\mu(\cdot)$  and covariance function  $k(\cdot, \cdot)$ . In particular, we use a product  
of squared exponential (SE) kernels for the covariance function:

$$k(\mathbf{x}, \mathbf{x}') = \prod_{d=1}^3 k_d(x_d, x'_d) = \prod_{d=1}^3 \rho_d \exp(x_d - x'_d) / 2\sigma_d^2, \quad [2]$$

This allows the prior covariance matrix to be decomposed as a  
Kronecker product  $K = K_1 \otimes K_2 \otimes K_3$ , dramatically increasing the  
efficiency of the fitting procedure (90).

The parameters  $\theta = \{\mu, \rho, \sigma\}$  are fitted from data by max-  
imizing the marginal likelihood of the data given parameters.  
Given estimated parameters,  $\hat{\theta}$ , we infer the predictive distribu-  
tion  $p(f_* | \mathcal{D}, \mathbf{x}_*, \hat{\theta})$  for a set of input values  $\mathbf{x}_*$  (defined below). This  
distribution can be computed by marginalizing over  $\mathbf{f}$ :

$$p(f_* | \mathcal{D}, \mathbf{x}_*, \hat{\theta}) = \int p(f_* | \mathcal{D}, \mathbf{x}_*, \hat{\theta}, \mathbf{f}) p(\mathbf{f} | \mathcal{D}, \hat{\theta}) d\mathbf{f} \quad [3]$$

This distribution is intractable, but can be approximated by  
using a Laplace approximation for  $p(\mathbf{f} | \mathcal{D}, \hat{\theta})$  so that ultimately  
 $p(f_* | \mathcal{D}, \mathbf{x}_*, \hat{\theta}) \approx \mathcal{N}(\mu_{f_*}, \sigma_{f_*}^2)$ . Finally, thanks to the exponential  
link function, the inferred firing rate of an individual input point  
 $\lambda(\mathbf{x}_*) = \exp(f_*)$  is log-normally distributed, whose mean and vari-  
ance can be easily computed as:

$$\mathbb{E}(\lambda(\mathbf{x}_*)) = \exp(\mu_{f_*} + \sigma_{f_*}^2 / 2) \quad [4]$$

and

$$\text{Var}(\lambda(\mathbf{x}_*)) = \exp(\sigma_{f_*}^2 - 1) \exp(2\mu_{f_*} + \sigma_{f_*}^2) \quad [5]$$

We chose input points  $\mathbf{x}_* = (\mathbf{s}, k)$  that corresponded to the binned  
2D location  $\mathbf{s}$  of the animal (5cm bins) and binned population  
synchrony  $k$  (10 equally weighted bins, each containing 10% of  
the data, i.e. the bin edges correspond to the (0th, 10th . . . , 100th)  
percentiles).

**Generating surrogate data.** At each moment in time, given the posi-  
tion  $\mathbf{s}$  and population synchrony  $k$ , the GP tuning estimate provides  
a distribution over possible firing rates for cell  $i$ ,  $\lambda_i(\mathbf{s}, k)$ , as a log  
normal distribution,  $\log \lambda_i \sim \mathcal{N}(\mu_{f_*}, \sigma_{f_*}^2)$ . This captures uncer-  
tainty about the tuning of the cell, given the data. We generate  
surrogate spike counts in two steps. First, we sample the mean

805 firing from this  $p(\lambda_i|s, K)$  distribution. Second, for each  $\lambda_i$  sample,  
 806 we draw the corresponding spike count from Poisson( $\lambda_i$ ). Applying  
 807 this procedure for all cells and all time points generates a surrogate  
 808 dataset from the unconstrained null model. We enforce the con-  
 809 straint  $\sum_i x_i = k$  by discarding and redrawing samples that do not  
 810 satisfy it. In rare cases (less than 2% of data), it was not possible to  
 811 replicate the desired  $k$  statistic, i.e. achieving the desired  $k$  required  
 812 more than 500 re-samplings. Such time bins were excluded from  
 813 subsequent analysis (both for real data and all surrogates). We  
 814 generate a total of 1000 surrogate datasets.

815 **Inference of excess correlations.** We use the pairwise correlations  
 816 between neural responses as the test statistic and compare it to  
 817 the distribution of pairwise correlations expected under the null  
 818 model that assumes that the firing rate of cells is only driven by  
 819 the stimulus and the synchrony of the population, without further  
 820 pairwise interactions.

821 Given the Pearson correlation coefficient between the activities  
 822 of cells  $i$  and  $j$  computed on real data,  $c_{ij}$ , and  $c_{ij}^\gamma$  the same quantity  
 823 computed on a surrogate dataset  $\{\mathbf{x}_{1:t}^\gamma\}$  for  $\gamma = 1, 2, \dots, 1000$ . We  
 824 define the quantity we refer to as “excess correlations” as:

$$825 \quad w_{ij} = \frac{c_{ij} - \langle c_{ij}^\gamma \rangle}{\sigma(c_{ij}^\gamma)} \quad [6]$$

826 where  $\langle \cdot \rangle$  denotes the sample average and  $\sigma$  the sample standard  
 827 deviation of  $c_{ij}^\gamma$ . Assuming that the  $c_{ij}^\gamma$  distribution is normal, this  
 828 quantity is closely related to confidence bounds, and p-values (via  
 829 the error function). An excess correlation is deemed significant if  
 830  $|w_{ij}| > 4.5$ , which corresponds to a p-value threshold of  $p = 0.05$   
 831 with a Bonferroni correction for the 7500 multiple comparisons.

832 **Validation.** To validate our method, we construct an artificial dataset  
 833 with known interactions, by sampling from a coupled stimulus depen-  
 834 dent MaxEnt model. We consider  $N = 50$  neurons and binary  
 835 activations  $\mathbf{x} = (x_1, \dots, x_N)^\top$  for any given time window. The dis-  
 836 tribution of responses  $\mathbf{x}$  given a location-stimulus  $s$  and synchrony  
 837 level  $k$  is

$$838 \quad p(\mathbf{x}|s, k) \propto \exp \left( \sum_i f_i(s)x_i + \sum_{i>j} W_{ij}x_ix_j - \sum_i (x_i - k/N) \right) \quad [7]$$

839 where  $s \in \{s_1, \dots, s_K\}$  is a spatial position chosen from a set  
 840 of discrete locations uniformly spaced in the environment, and  
 841 the feedforward input to each cell,  $f_i = f_i(s)$ , is as described in  
 842 methods subsection (D). We try to match the general statistics of  
 843 the data as closely as possible. In particular, we match the true  
 844 time-dependent occupancy,  $s_t$ , observed in a 20 minutes exploration  
 845 session, and the corresponding time-dependent synchrony observed  
 846 in the same session,  $k_t$ , by sampling one population activity vector  
 847 (after adequate burn-in time) at each time point  $\mathbf{x}(t) \sim P(\mathbf{x}|s_t, k_t)$   
 848 using Gibbs sampling (91).

849 Given this artificial dataset, we analyze it with the same pro-  
 850 cessing pipeline that we use for the neural recordings and compare  
 851 the estimated interactions  $w_{ij}$  with the ground truth couplings  $W_{ij}$ ,  
 852 which are randomly and independently drawn from  $\mathcal{N}(0, 1)$ . Fur-  
 853 thermore, we generate data with the same constraints but without  
 854 any interactions. We assess the ability of our statistical test to detect  
 855 true interactions using the receiver operating characteristic (ROC),  
 856 and estimate false positive rates for our statistical test.

## 857 D. Hippocampal population responses with adjustable network 858 structure.

859 **Stimulus dependent MaxEnt model.** In order to explore the effects  
 860 of the noise correlation structure on the coding properties of the  
 861 hippocampal system, we employed a statistical model of the col-  
 862 lective behavior of a population of place cells that allowed us to  
 863 vary the couplings among cells while keeping fixed the output firing  
 864 rate. A similar, stimulus dependent maxent model was introduced  
 865 in (53), and more recently was used in (11) to prove that correlation  
 866 patterns in CA1 hippocampus are not due to place encoding only,  
 867 but also to internal structure and pairwise interactions. Our model  
 868 includes spatially-selective inputs with adjustable strength,  $h$ , and

869 noise correlations modelled as a matrix  $\mathbf{W}$  describing the strength of  
 870 interaction between cell pairs. Additionally, we constrained average  
 871 population firing rates to be the same for each possible choice of  $h$   
 872 and  $\mathbf{W}$ , as a way of implementing metabolic resource constraints.

873 More specifically, consider  $N$  neurons with binary activations  
 874  $\mathbf{x} = (x_1, \dots, x_N)^\top$ . The distribution of responses  $\mathbf{x}$  given a location-  
 875 stimulus  $s$  we considered is

$$876 \quad p(\mathbf{x}|s) \propto \exp \left( h \sum_i f_i(s)x_i + \sum_{i>j} W_{ij}x_ix_j - h_0 \sum_i x_i \right) \quad [8]$$

877 where  $s \in \{s_1, \dots, s_K\}$  is a spatial position chosen from a set of  
 878 discrete locations uniformly spaced in the environment (the unit  
 879 square,  $[0, 1] \times [0, 1]$ ). The feedforward input to each cell,  $f_i = f_i(s)$ ,  
 880 is modelled as a 2-D Gaussian bump with continuous boundary  
 881 conditions, mean randomly drawn from a uniform on  $[0, 1] \times [0, 1]$   
 882 and fixed covariance  $0.1\mathbb{I}$ . The parameter  $h_0$  allows us to fix the  
 883 average population firing rate to 20% of the population size, and  
 884 is found by grid optimization. Once the input tuning  $f_i$  is fixed  
 885 for each cell, we select the connections  $W_{ij}$  for each cell pair by  
 886 sampling from the data-inferred excess correlations of cell pairs with  
 887 similar tuning similarity, and then scaling according to the results  
 888 found during method validation (Fig S 1). We did so separately for  
 889 familiar and for novel environments. Finally, we fix the appropriate  
 890 parameter  $h$ , separately for familiar-like and novel-like connections,  
 891 by matching single neurons marginal statistics. We utilized three  
 892 measures: single cell spatial information, sparsity and gain, which  
 893 are described in detail in Methods subsection (E).

## 894 Optimization of connections for fixed input and fixed firing rate.

895 Given  $h, \{f_i(\cdot)\}$ , we optimize the connections  $\mathbf{W}$  so as to maximize  
 896 the mutual information between population activity and spatial po-  
 897 sition,  $MI(\mathbf{x}; s) = \sum_{\mathbf{x}, s} p(\mathbf{x}|s)p(s) \log \frac{p(\mathbf{x}|s)}{p(\mathbf{x})}$ , via Sequential Least  
 898 Squares Programming (SLSQP) (92). We further constrain the  
 899 population average firing to 20% of the neural population, and each  
 900  $W_{ij}$  is restricted to lay in  $[-1, 1]$ . Both reflect biological resource  
 901 constraints on the optimal solution.

902 Most simulations use  $N = 10$  neurons, which allows the mutual  
 903 information to be computed in closed form (by enumerating all  
 904 possible patterns). Reported estimates are obtained by averaging  
 905 across 1000 randomly initialized networks (different  $f_i(\cdot)$  centers,  
 906 and initial conditions for the optimization). To ensure that our  
 907 results generalize to large networks, we also performed limited  
 908 numerical simulations for  $N = 20$  (only for  $h = 2$  and  $h = 4$ ,  
 909 averaging over 10 networks).

## 910 Optimal coding for large networks.

911 The exact computation of the mutual information  $MI(\mathbf{x}; s)$  is very resource intensive and only  
 912 applicable to small networks ( $N \leq 20$ ). To investigate the effects  
 913 of noise correlations at larger scales we need to rely on efficient  
 914 approximations. The mutual information between population binary  
 915 responses  $\mathbf{x}$  and location-stimulus  $s$  can be written as

$$916 \quad MI(\mathbf{x}; s) = \sum_{\mathbf{x}, s} p(s|\mathbf{x})p(\mathbf{x}) \log p(s|\mathbf{x}) - \sum_{\mathbf{x}, s} p(s|\mathbf{x})p(\mathbf{x}) \log p(s) \quad [9]$$

$$= H(s) - H(s|\mathbf{x}),$$

917 where  $H$  denotes (conditional) entropy. Assuming that  $p(s)$  is a  
 918 uniform distribution over stimuli, we have  $H(s) = 2 \log B$ , where  $B$   
 919 is the number of bins used to discretize each dimension of the 2-dim  
 920 environment. We generally use  $B = 16$ . The challenge is to compute  
 921  $H(s|\mathbf{x})$ . For a given  $\mathbf{x}$ , denote with  $\hat{h}(\mathbf{x}) := - \sum_s p(s|\mathbf{x}) \log p(s|\mathbf{x})$ .  
 922 Then we have:

$$923 \quad H(s|\mathbf{x}) = - \sum_{\mathbf{x}, s} p(s|\mathbf{x})p(\mathbf{x}) \log p(s|\mathbf{x})$$

$$= \sum_{\mathbf{x}} p(\mathbf{x}) \hat{h}(\mathbf{x}) \quad [10]$$

$$= \sum_s p(s) \sum_{\mathbf{x}} p(\mathbf{x}|s) \hat{h}(\mathbf{x})$$

924 We used the last expression and estimated  $H(s|\mathbf{x})$  by drawing  $10^6$   
 925 samples from  $p(\mathbf{x}|s)$  for each stimulus  $s$  using Gibbs sampling (91).



We reported the estimated average across stimuli and confidence intervals in the figures. The quantity  $\hat{h}(\mathbf{x}) = -\sum_s p(s|\mathbf{x}) \log p(s|\mathbf{x})$  is the entropy of the posterior distribution on stimuli given a certain binary vector. The main obstacle to computing  $\hat{h}$  is that, for each stimulus  $s$ , we need to know the proportionality constant  $Z_s = \sum_{\mathbf{x}} p(\mathbf{x}|s)$  (i.e. the partition function), that makes the probability (8) sum up to 1. We computed  $Z_s$  exhaustively for  $N \leq 20$  by enumerating all the possible binary vectors. For  $N \geq 20$  we estimated it using a simple Monte Carlo method by randomly drawing  $10^9$  independent  $N$ -dim binary samples for each stimulus, and then regularizing by applying a mild 2D gaussian smoothing ( $\sigma = 0.5$  bins) on the log-transformed  $Z_s$  among neighboring stimuli.

**“Topology” model simulations.** We aimed at characterizing the influence of higher order structure on the coding of the network. We used the same model as in eq. [8] with 50 place cells, but allowed connections to be either  $-J$ , 0 or  $+J$ , where  $J \in [0, 1]$  is the connection strength. We employed three different strategies to select the units to connect, as described in the main text, based on their tuning similarity. We kept fixed the number of positive ( $+J$ ) and negative ( $-J$ ) couplings to 6% and 3% respectively. For each choice of tuning, connectivity rule and strength  $J$  we used the parameter  $h_0$  to enforce the population average firing to be 20% of the population size.

## E. Analysis of experimental data.

**Single cell tuning characterization.** To describe the tuning properties of single cells we employed several measures:

- gain: peak firing rate over mean, estimated from the tuning function of a cell,
- sparsity:  $\langle \lambda_x \rangle_x / \langle \lambda_x^2 \rangle_x$ , where  $\lambda_x$  denotes the average firing at location  $x$ , is a measure of how compact the firing field is relative to the recording apparatus (93),
- spatial information:  $\langle \frac{\lambda_x}{\lambda} \log \frac{\lambda_x}{\lambda} \rangle_x$ , where  $\lambda = \langle \lambda_x \rangle_x$ , is the leading term of the MI between average spiking and discretized occupancy for small time windows (50, 94).

**Decoding of spatial position from data.** We subdivided the environment in equally spaced 2-dimensional bins with bin side length of 20 cm. This choice was due to the fact that, to properly estimate the average co-activation of cells one needs many samples and a finer subdivision of the environment made this task extremely difficult. We randomly subdivided the data in two parts, 75% for training and 25% for decoding. With the training data we estimated, for each bin separately, the average activation and the covariance of the neurons activity. With the remaining 25% of the data, we computed for each non-overlapping 10 consecutive 25.6 ms time bins the activation (denoted by population vector or PV) and the covariance (COV). We then simply compared them to all the expected PV and COV measured over the training set in different bins and picked the most similar one in terms of Pearson correlation.

**PCA, linear separability of pairs of stimuli.** We wanted to investigate the linear separability of population responses to different locations. We randomly selected 500 times two distinct locations in the environment and selected all the 250ms population responses in a 10 cm surrounding of the two positions. We then found the best hyperplane that separated the two sets of responses by using a soft-margin linear SVM with hinge loss, and reported the training error. We also computed the principal components of the population responses to both locations together, and reported the variance explained by the first PC.

## F. Network analysis.

**Graph theoretical measures.** All the measures were carried out using the library NetworkX (release 2.4) in Python 3.7. We considered unweighted and non directed graphs where each cell was a vertex and an edge connected each cell pair that had a significant interaction ( $|w_{ij}| > 4.5$ ). A graph  $G = (V, E)$  formally consists of a set of vertices  $V$  and a set of edges  $E$  between them. An edge  $e_{ij}$  connects vertex  $v_i$  with vertex  $v_j$ . The neighbourhood for a vertex  $v_i$  is defined as its immediately connected neighbours:  $N_i = \{v_j : e_{ij} \in E \vee e_{ji} \in E\}$  and its size will be denoted by  $k_i = |N_i|$ .

We measured:

1. **Clustering coefficient:** this measure represents the average clustering coefficient of each node, which is defined as the fraction of existing over possible triangles that include that node as a vertex. Formally, the local clustering coefficient  $c_i$  for a vertex  $v_i$  is given by the proportion of links between the vertices within its neighbourhood divided by the number of links that could possibly exist between them, hence measuring how close its neighbourhood is to forming a clique. If a vertex  $v_i$  has  $k_i$  neighbours,  $\frac{k_i(k_i-1)}{2}$  edges could exist among the vertices within the neighbourhood. Thus, the local clustering coefficient for vertex  $v_i$  can be defined as

$$c_i = \frac{2|\{e_{jk} : v_j, v_k \in N_i, e_{jk} \in E\}|}{k_i(k_i - 1)}$$

and the average clustering coefficient as

$$c_G = \frac{1}{n} \sum_{v_i \in V} c_i$$

2. **Average shortest path length:** this measure can be computed only if the graph is connected. If not, we computed this measure on the largest connected subgraph.

$$a_G = \sum_{u, v \in V} \frac{d(u, v)}{n(n-1)}$$

where  $u, v$  are distinct vertices,  $d(u, v)$  is the shortest path length between  $u, v$  and  $n$  is the size of the graph  $G$ .

**Triangles analyses.** We tested for the over-expression of particular interaction patterns by counting the number of triangles (i.e 3 all-to-all interacting cells) composed by 3 inhibitory cells, 2 inhibitory and 1 excitatory, 1 inhibitory and 2 excitatory or 3 excitatory cells. We tested these counts against the counts from the same networks with shuffled edges. We employed an edge-shuffling procedure that preserved both the total number of edges and the number of incident edges per node, separately for the EE, EI and II subnetworks (i.e. an edge connecting two excitatory cells could be exchanged only with another edge connecting two excitatory edges etc). To do this, we randomly selected two edges of each subnetwork, say  $AB$  and  $CD$ . If  $A \neq C \neq D$  and  $B \neq C \neq D$  we removed the two edges and inserted the “swapped” ones,  $AC$  and  $BD$ . We repeated this procedure 100 times for each subnetwork to yield one shuffled network. We repeated this procedure 1000 times, which gave us a null distribution to test the original counts against. In Supp. Fig. 5 we reported the counts of each pattern, separately for familiar and novel environments, normalized against our null distribution.

**Betti numbers.** We computed the Betti numbers of the clique-complex induced by the graphs. These are distinct from the graphs Betti numbers (95). A clique in a graph is an all-to-all connected set of vertices. The clique complex  $X(G)$  of an undirected graph  $G$  is an abstract simplicial complex (that is, a family of finite sets closed under the operation of taking subsets), formed by the sets of vertices in the cliques of  $G$ . Intuitively, the clique-topology can be characterized by counting arrangements of cliques which bound holes. Formally, the dimensions of the homology groups  $Hm(X(G), \mathbb{Z}_2)$  yield the Betti numbers  $b_m$  (95). Given our low connectivity (9%),  $b_m$  was almost always zero for  $m \geq 2$ . On the other side,  $b_0$  simply counts the number of connected components, so in our analysis we focused on  $b_1$ . This is the number of cycles, or holes, that are bounded by 1-dim cliques. Graphically, these are 4 edges that form a square, or 5 edges that form a pentagon etc. Notice that 3 edges that form a triangle don’t count towards  $b_1$ , because they represent a 2-dim clique (i.e. 3 vertices that are all-to-all connected). This is why a higher clustering coefficient (i.e. more triangles) implies a lower  $b_1$ .

**ACKNOWLEDGMENTS.** We thank Peter Baracska, Karola Kaefer and Hugo Malagon-Vina for the acquisition of the data. We



- 1054 thank Federico Stella for comments on an earlier version of the  
1055 manuscript. MN was supported by European Union Horizon 2020  
1056 grant 665385, JC was supported by European Research Council con-  
1057 solidator grant 281511, GT was supported by the Austrian Science  
1058 Fund (FWF) grant P34015, CS was supported by an IST fellow  
1059 grant, National Institute of Mental Health Award 1R01MH125571-  
1060 01, by the National Science Foundation under NSF Award No.  
1061 1922658 and a Google faculty award.
- 1062 1. WB Scoville, B Milner, Loss of recent memory after bilateral hippocampal lesions. *J. neurology, neurosurgery, psychiatry* **20**, 11 (1957).
  - 1063 2. H Eichenbaum, A cortical-hippocampal system for declarative memory. *Nat. Rev. Neurosci.* **1**, 41–50 (2000).
  - 1064 3. J O’Keefe, J Dostrovsky, The hippocampus as a spatial map: Preliminary evidence from unit  
1065 activity in the freely-moving rat. *Brain research* **34**, 171–5 (1971).
  - 1066 4. RG Morris, P Garrud, Ja Rawlins, J O’Keefe, Place navigation impaired in rats with hippocampal  
1067 lesions. *Nature* **297**, 681–683 (1982).
  - 1068 5. El Moser, O Paulsen, New excitement in cognitive space: between place cells and spatial  
1069 memory. *Curr. opinion neurobiology* **11**, 745–751 (2001).
  - 1070 6. BL McNaughton, FP Battaglia, O Jensen, El Moser, MB Moser, Path integration and the  
1071 neural basis of the ‘cognitive map’. *Nat. Rev. Neurosci.* **7**, 663–678 (2006).
  - 1072 7. KD Harris, J Csicsvari, H Hirase, G Dragoi, G Buzsáki, Organization of cell assemblies in the  
1073 hippocampus. *Nature* **424**, 552–556 (2003).
  - 1074 8. KD Harris, Neural signatures of cell assembly organization. *Nat. Rev. Neurosci.* **6**, 399–407  
1075 (2005).
  - 1076 9. JJ Hopfield, Neural networks and physical systems with emergent collective computational  
1077 abilities. *Proc. national academy sciences* **79**, 2554–2558 (1982).
  - 1078 10. F Stefanini, et al., A distributed neural code in the dentate gyrus and in ca1. *Neuron* **107**,  
1079 703–716 (2020).
  - 1080 11. L Meshulam, JL Gauthier, CD Brody, DW Tank, W Bialek, Collective behavior of place and  
1081 non-place neurons in the hippocampal network. *Neuron* **96**, 1178–1191 (2017).
  - 1082 12. M Wilson, B McNaughton, Dynamics of the hippocampal ensemble code for space. *Science*  
1083 **261**, 1055–1058 (1993).
  - 1084 13. S Leutgeb, JK Leutgeb, A Treves, MB Moser, El Moser, Distinct Ensemble Codes in Hip-  
1085 pocampal Areas CA3 and CA1. *Science* **305**, 1295–1298 (2004).
  - 1086 14. MP Karlsson, LM Frank, Network dynamics underlying the formation of sparse, informative  
1087 representations in the hippocampus. *J. Neurosci.* **28**, 14271–14281 (2008).
  - 1088 15. M Ariaga, EB Han, Structured inhibitory activity dynamics in new virtual environments. *eLife*  
1089 **8**, e47611 (2019).
  - 1090 16. D Nitz, B McNaughton, Differential modulation of ca1 and dentate gyrus interneurons during  
1091 exploration of novel environments. *J. neurophysiology* **91**, 863–872 (2004).
  - 1092 17. T Geiller, et al., Large-scale 3d two-photon imaging of molecularly identified ca1 interneuron  
1093 dynamics in behaving mice. *Neuron* **108**, 968–983 (2020).
  - 1094 18. JD Cohen, M Bolstad, AK Lee, Experience-dependent shaping of hippocampal ca1 intracel-  
1095 lular activity in novel and familiar environments. *eLife* **6**, e23040 (2017).
  - 1096 19. V Pedrosa, C Clopath, The interplay between somatic and dendritic inhibition promotes the  
1097 emergence and stabilization of place fields. *PLoS computational biology* **16**, e1007955  
1098 (2020).
  - 1099 20. T Hafting, M Fyhn, S Molden, MB Moser, El Moser, Microstructure of a spatial map in the  
1100 entorhinal cortex. *Nature* **436**, 801–806 (2005).
  - 1101 21. C Barry, LL Ginzberg, J O’Keefe, N Burgess, Grid cell firing patterns signal environmental  
1102 novelty by expansion. *Proc. Natl. Acad. Sci.* **109**, 17687–17692 (2012).
  - 1103 22. VH Brun, et al., Place cells and place recognition maintained by direct entorhinal-  
1104 hippocampal circuitry. *Science* **296**, 2243–2246 (2002).
  - 1105 23. VH Brun, et al., Impaired spatial representation in ca1 after lesion of direct input from entorhinal  
1106 cortex. *Neuron* **57**, 290–302 (2008).
  - 1107 24. MR Cohen, A Kohn, Measuring and interpreting neuronal correlations. *Nat. neuroscience* **14**,  
1108 811–819 (2011).
  - 1109 25. BB Averbeck, PE Latham, A Pouget, Neural correlations, population coding and computation.  
1110 *Nat. reviews neuroscience* **7**, 358–366 (2006).
  - 1111 26. I Kanitscheider, R Coen-Cagli, A Pouget, Origin of information-limiting noise correlations.  
1112 *Proc. Natl. Acad. Sci.* **112**, E6973–E6982 (2015).
  - 1113 27. OI Rummyantsev, et al., Fundamental bounds on the fidelity of sensory cortical coding. *Nature*  
1114 **580**, 100–105 (2020).
  - 1115 28. S Panzeri, SR Schultz, A Treves, ET Rolls, Correlations and the encoding of information in  
1116 the nervous system. *Proc. Royal Soc. London. Ser. B: Biol. Sci.* **266**, 1001–1012 (1999).
  - 1117 29. G Tkačik, JS Prentice, V Balasubramanian, E Schneidman, Optimal population coding by  
1118 noisy spiking neurons. *Proc. Natl. Acad. Sci.* **107**, 14419–14424 (2010).
  - 1119 30. RA da Silveira, MJ Berry, High-fidelity coding with correlated neurons. *PLoS computational*  
1120 *biology* **10**, e1003970 (2014).
  - 1121 31. BA Brinkman, Al Weber, F Rieke, E Shea-Brown, How do efficient coding strategies depend  
1122 on origins of noise in neural circuits? *PLoS computational biology* **12**, e1005150 (2016).
  - 1123 32. LL Colgin, Mechanisms and functions of theta rhythms. *Annu. review neuroscience* **36**, 295–  
1124 312 (2013).
  - 1125 33. P Fries, Neuronal gamma-band synchronization as a fundamental process in cortical compu-  
1126 tation. *Annu. review neuroscience* **32**, 209–224 (2009).
  - 1127 34. C Savin, G Tkačik, Maximum entropy models as a tool for building precise neural controls.  
1128 *Curr. opinion neurobiology* **46**, 120–126 (2017).
  - 1129 35. AK Engel, P Fries, W Singer, Dynamic predictions: oscillations and synchrony in top-down  
1130 processing. *Nat. Rev. Neurosci.* **2**, 704–716 (2001).
  - 1131 36. GP Gava, et al., Integrating new memories into the hippocampal network activity space. *Nat.*  
1132 *Neurosci.* **24**, 326–330 (2021).
  - 1133 37. K Kaefer, et al., Disrupted-in-schizophrenia 1 overexpression disrupts hippocampal coding  
1134 and oscillatory synchronization. *Hippocampus* **29**, 802–816 (2019).
  - 1135 38. F Stella, P Baracska, J O’Neill, J Csicsvari, Hippocampal reactivation of random trajectories  
1136 resembling brownian diffusion. *Neuron* **102**, 450–461 (2019).
  - 1137 39. KD Harris, DA Henze, J Csicsvari, H Hirase, G Buzsáki, Accuracy of tetrobe spike separation  
1138 as determined by simultaneous intracellular and extracellular measurements. *J. neurophysi-*  
1139 *ology* **84**, 401–414 (2000).
  - 1140 40. N Schmitzer-Torbert, J Jackson, D Henze, K Harris, A Redish, Quantitative measures of  
1141 cluster quality for use in extracellular recordings. *Neuroscience* **131**, 1–11 (2005).
  - 1142 41. DN Hill, SB Mehta, D Kleinfeld, Quality metrics to accompany spike sorting of extracellular  
1143 signals. *J. Neurosci.* **31**, 8699–8705 (2011).
  - 1144 42. S Li, WK Cullen, R Anwyl, MJ Rowan, Dopamine-dependent facilitation of ltp induction in  
1145 hippocampal ca1 by exposure to spatial novelty. *Nat. neuroscience* **6**, 526–531 (2003).
  - 1146 43. JR Whitlock, AJ Heynen, MG Shuler, MF Bear, Learning induces long-term potentiation in  
1147 the hippocampus. *science* **313**, 1093–1097 (2006).
  - 1148 44. F Cacciuci, TJ Wills, C Lever, KP Giese, J O’Keefe, Experience-dependent increase in ca1  
1149 place cell spatial information, but not spatial reproducibility, is dependent on the autophospho-  
1150 rylation of the  $\alpha$ -isoform of the calcium/calmodulin-dependent protein kinase ii. *J. Neurosci.*  
1151 **27**, 7854–7859 (2007).
  - 1152 45. D Dupret, J O’Neill, J Csicsvari, Dynamic reconfiguration of hippocampal interneuron circuits  
1153 during spatial learning. *Neuron* **78**, 166–180 (2013).
  - 1154 46. S McKenzie, et al., Preexisting hippocampal network dynamics constrain optogenetically in-  
1155 duced place fields. *Neuron* **109**, 1–15 (2021).
  - 1156 47. J Csicsvari, H Hirase, A Czurko, G Buzsáki, Reliability and state dependence of pyramidal  
1157 cell-interneuron synapses in the hippocampus: an ensemble approach in the behaving rat.  
1158 *Neuron* **21**, 179–189 (1998).
  - 1159 48. T Klausberger, P Somogyi, Neuronal diversity and temporal dynamics: the unity of hippocampal  
1160 circuit operations. *Science* **321**, 53–57 (2008).
  - 1161 49. JC Whittington, et al., The Tolman-Eichenbaum Machine: Unifying Space and Relational  
1162 Memory through Generalization in the Hippocampal Formation. *Cell* **183**, 1–15 (2020).
  - 1163 50. WE Skaggs, BL McNaughton, KM Gothard, An information-theoretic approach to deciphering  
1164 the hippocampal code in *Advances in neural information processing systems*. pp. 1030–1037  
1165 (1993).
  - 1166 51. LM Frank, EN Brown, MA Wilson, A comparison of the firing properties of putative excitatory  
1167 and inhibitory neurons from ca1 and the entorhinal cortex. *J. neurophysiology* **86**, 2029–2040  
1168 (2001).
  - 1169 52. DJ Watts, SH Strogatz, Collective dynamics of ‘small-world’ networks. *nature* **393**, 440–442  
1170 (1998).
  - 1171 53. E Granot-Atedgi, G Tkačik, R Segev, E Schneidman, Stimulus-dependent maximum entropy  
1172 models of neural population codes. *PLoS Comput. Biol* **9**, e1002922 (2013).
  - 1173 54. J O’Neill, TJ Senior, K Allen, JR Huxter, J Csicsvari, Reactivation of experience-dependent  
1174 cell assembly patterns in the hippocampus. *Nat. neuroscience* **11**, 209–215 (2008).
  - 1175 55. MD Humphries, Dynamical networks: finding, measuring, and tracking neural population ac-  
1176 tivity using network science. *Netw. Neurosci.* **1**, 324–338 (2017).
  - 1177 56. DS Bassett, O Sporns, Network neuroscience. *Nat. neuroscience* **20**, 353–364 (2017).
  - 1178 57. A Mathis, AV Herz, MB Stemmler, Multiscale codes in the nervous system: The problem of  
1179 noise correlations and the ambiguity of periodic scales. *Phys. Rev. E* **88**, 022713 (2013).
  - 1180 58. G Tocker, O Barak, D Derdikman, Grid cells correlation structure suggests organized feed-  
1181 forward projections into superficial layers of the medial entorhinal cortex. *Hippocampus* **25**,  
1182 1599–1613 (2015).
  - 1183 59. B Dunn, M Morreanet, Y Roudi, Correlations and functional connections in a population of  
1184 grid cells. *PLoS Comput. Biol* **11**, e1004052 (2015).
  - 1185 60. M El-Gaby, et al., An emergent neural coactivity code for dynamic memory. *Nat. Neurosci.* **11**,  
1186 1–11 (2021).
  - 1187 61. BL McNaughton, CA Barnes, J O’Keefe, The contributions of position, direction, and velocity  
1188 to single unit activity in the hippocampus of freely-moving rats. *Exp. brain research* **52**, 41–49  
1189 (1983).
  - 1190 62. F Fuhrmann, et al., Locomotion, theta oscillations, and the speed-correlated firing of hip-  
1191 pocampal neurons are controlled by a medial septal glutamatergic circuit. *Neuron* **86**, 1253–  
1192 1264 (2015).
  - 1193 63. ME Sheffield, MD Adoff, DA Dombeck, Increased prevalence of calcium transients across the  
1194 dendritic arbor during place field formation. *Neuron* **96**, 490–504 (2017).
  - 1195 64. E Bullmore, O Sporns, Complex brain networks: graph theoretical analysis of structural and  
1196 functional systems. *Nat. reviews neuroscience* **10**, 186–198 (2009).
  - 1197 65. R Perin, TK Berger, H Markram, A synaptic organizing principle for cortical neuronal groups.  
1198 *Proc. Natl. Acad. Sci.* **108**, 5419–5424 (2011).
  - 1199 66. V Latora, M Marchiori, Efficient behavior of small-world networks. *Phys. review letters* **87**,  
1200 198701 (2001).
  - 1201 67. LK Gallos, HA Makse, M Sigman, A small world of weak ties provides optimal global in-  
1202 tegration of self-similar modules in functional brain networks. *Proc. Natl. Acad. Sci.* **109**,  
1203 2825–2830 (2012).
  - 1204 68. A Das, IR Fiete, Systematic errors in connectivity inferred from activity in strongly recurrent  
1205 networks. *Nat. Neurosci.* **23**, 1286–1296 (2020).
  - 1206 69. E Schneidman, MJ Berry, R Segev, W Bialek, Weak pairwise correlations imply strongly  
1207 correlated network states in a neural population. *Nature* **440**, 1007–1012 (2006).
  - 1208 70. G Tkačik, et al., Searching for collective behavior in a large network of sensory neurons.  
1209 *PLoS computational biology* **10**, e1003408 (2014).
  - 1210 71. JJ Atick, AN Redlich, Towards a theory of early visual processing. *Neural computation* **2**,  
1211 308–320 (1990).
  - 1212 72. E Doi, MS Lewicki, A theory of retinal population coding. *Adv. neural information processing*  
1213 *systems* **19**, 353 (2007).
  - 1214 73. BG Borghuis, CP Ratliff, RG Smith, P Sterling, V Balasubramanian, Design of a neuronal  
1215 array. *J. Neurosci.* **28**, 3178–3189 (2008).
  - 1216 74. JL Puchalla, E Schneidman, RA Harris, MJ Berry, Redundancy in the population code of the  
1217 retina. *Neuron* **46**, 493–504 (2005).
  - 1218 75. H Barlow, Redundancy reduction revisited. *Network: computation neural systems* **12**, 241  
1219 1220

- 1221 (2001).
- 1222 76. HB Barlow, et al., Possible principles underlying the transformation of sensory messages.  
1223 *Sens. communication* **1** (1961).
- 1224 77. R Linsker, An application of the principle of maximum information preservation to linear sys-  
1225 tems in *Advances in neural information processing systems*. pp. 186–194 (1989).
- 1226 78. JH van Hateren, A theory of maximizing sensory information. *Biol. cybernetics* **68**, 23–29  
1227 (1992).
- 1228 79. Y Karklin, EP Simoncelli, Efficient coding of natural images with a population of noisy linear-  
1229 nonlinear neurons. *Adv. neural information processing systems* **24**, 999 (2011).
- 1230 80. F Weber, CK Machens, A Borst, Disentangling the functional consequences of the connectiv-  
1231 ity between optic-flow processing neurons. *Nat. neuroscience* **15**, 441–448 (2012).
- 1232 81. AM Hermundstad, et al., Variance predicts salience in central sensory processing. *Elife* **3**,  
1233 e03722 (2014).
- 1234 82. M Chalk, O Marre, G Tkačik, Toward a unified theory of efficient, predictive, and sparse  
1235 coding. *Proc. Natl. Acad. Sci.* **115**, 186–191 (2018).
- 1236 83. J O'Neill, T Senior, J Csicsvari, Place-selective firing of ca1 pyramidal cells during sharp  
1237 wave/ripple network patterns in exploratory behavior. *Neuron* **49**, 143–155 (2006).
- 1238 84. J Csicsvari, H Hirase, A Mamiya, G Buzsáki, Ensemble patterns of hippocampal ca3-ca1  
1239 neurons during sharp wave-associated population events. *Neuron* **28**, 585–594 (2000).
- 1240 85. G Buzsáki, EI Moser, Memory, navigation and theta rhythm in the hippocampal-entorhinal  
1241 system. *Nat. neuroscience* **16**, 130–138 (2013).
- 1242 86. K Mizuseki, G Buzsáki, Theta oscillations decrease spike synchrony in the hippocampus and  
1243 entorhinal cortex. *Philos. Transactions Royal Soc. B: Biol. Sci.* **369**, 20120530 (2014).
- 1244 87. WH Press, SA Teukolsky, WT Vetterling, BP Flannery, Numerical recipes in c++. *The art*  
1245 *scientific computing* **2**, 1002 (1992).
- 1246 88. CE Rasmussen, Gaussian processes in machine learning in *Summer school on machine*  
1247 *learning*. (Springer), pp. 63–71 (2003).
- 1248 89. C Savin, G Tkacik, Estimating nonlinear neural response functions using gp priors and kro-  
1249 necker methods in *Advances in Neural Information Processing Systems*. pp. 3603–3611  
1250 (2016).
- 1251 90. S Flaxman, A Wilson, D Neill, H Nickisch, A Smola, Fast kronecker inference in gaussian  
1252 processes with non-gaussian likelihoods in *International Conference on Machine Learning*.  
1253 (PMLR), pp. 607–616 (2015).
- 1254 91. S Geman, D Geman, Stochastic relaxation, gibbs distributions, and the bayesian restoration  
1255 of images. *IEEE Transactions on pattern analysis machine intelligence* **6**, 721–741 (1984).
- 1256 92. P Virtanen, et al., SciPy 1.0: Fundamental Algorithms for Scientific Computing in Python. *Nat.*  
1257 *Methods* **17**, 261–272 (2020).
- 1258 93. MW Jung, SI Wiener, BL McNaughton, Comparison of spatial firing characteristics of units in  
1259 dorsal and ventral hippocampus of the rat. *J. Neurosci.* **14**, 7347–7356 (1994).
- 1260 94. BC Souza, R Pavão, H Belchior, AB Tort, On information metrics for spatial coding. *Neuro-*  
1261 *science* **375**, 62–73 (2018).
- 1262 95. C Giusti, E Pastalkova, C Curto, V Itskov, Clique topology reveals intrinsic geometric structure  
1263 in neural correlations. *Proc. Natl. Acad. Sci.* **112**, 13455–13460 (2015).

Supplementary figures

1264

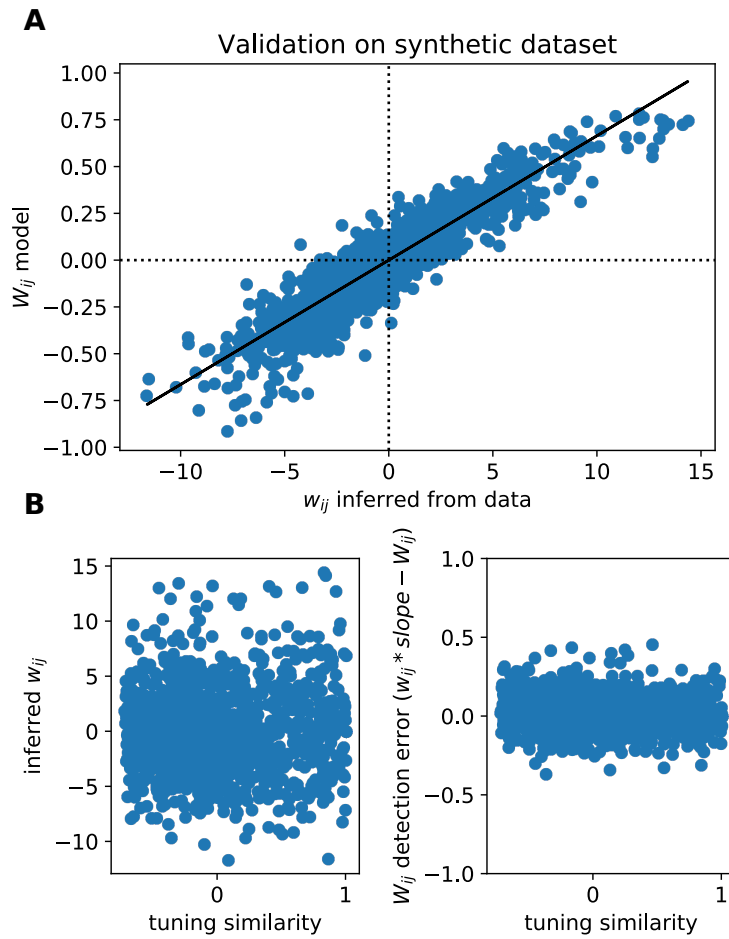

**Figure S1. Further data on validation and null model.** (A) Scatter plot of ground truth  $W_{ij}$  values used in the model for validation vs  $w_{ij}$  inferred from artificial data. (B) Left: Scatter of inferred  $w_{ij}$  vs tuning similarity. Notice the absence of bias towards detection for cells with higher or lower tuning similarity. Right:  $W_{ij}$  detection error inferred as the difference between  $w_{ij}$  (scaled by the appropriate slope) and the true  $W_{ij}$ . Notice the absence of bias towards highly similarly tuned pairs.

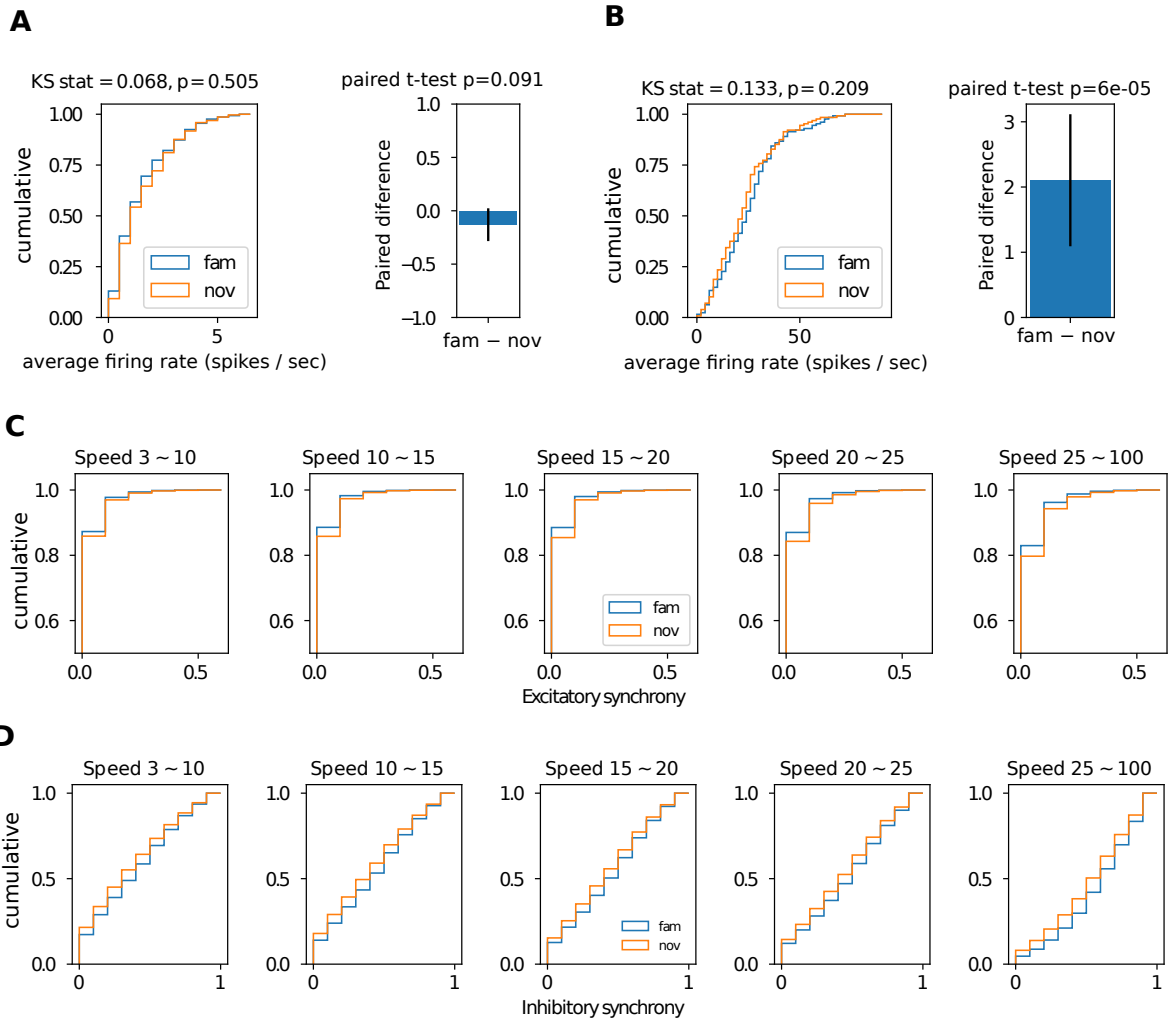

**Figure S2. Population marginal statistics.** (A) Left: distribution of average firing rates of putative CA1 excitatory neurons in familiar (blue) and novel (orange) environment. Right: paired difference across environments (familiar – novel). Error bars represent 95th CI for the mean. (B) Same as (A) for putative inhibitory neurons. (C) Distribution of synchrony in 25 ms time windows of excitatory neurons for different behavioral speed: [3, 10), [10, 15), [15, 20), [20, 25), [25, 100) cm/sec for familiar (blue) and novel (orange). All KS test  $p < 0.0001$ . (D) Same as (C) for putative inhibitory neurons.



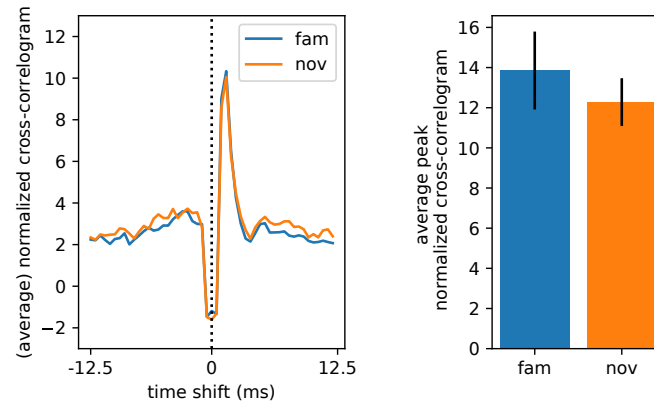

**Figure S3. Efficacy of monosynaptic excitatory-inhibitory connections.** Left: average normalized cross-correlogram of putative monosynaptically connected excitatory-inhibitory pairs. The cross correlogram was normalized by subtracting the mean and dividing by the STD of cross-correlograms computed on randomly shifted data 100 times. The pairs that had peak (normalized) cross-correlogram  $> 7STD$  in both environments were labelled as monosynaptically connected (47). Right: average peak of normalized cross-correlogram for familiar and novel environments. Error bars represent 95th CI for the mean. Paired T-test  $p = 0.61$ .

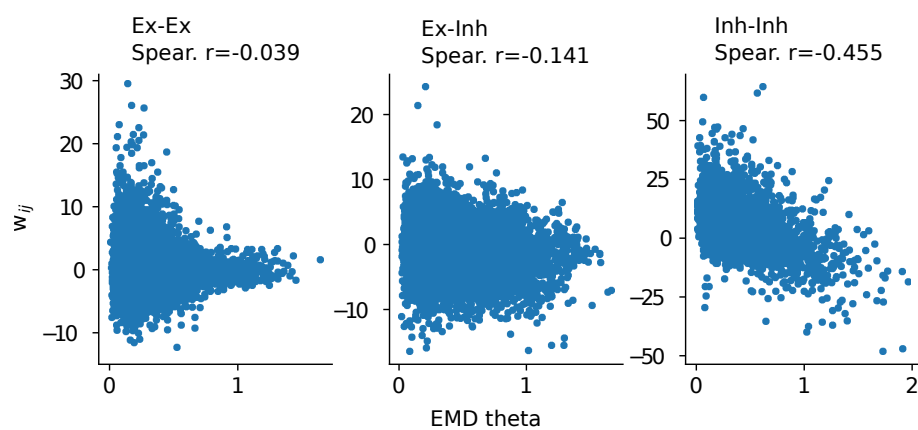

**Figure S4. Theta selectivity similarity versus excess correlation.** Scatter plot of inferred  $w_{ij}$  vs dissimilarity of theta selectivity measured using an earth mover distance (EMD) among the histograms of preferred theta phases (t-test for Spearman rank correlations: EE  $p > 0.05$ , EI  $p < 0.001$ , EE  $p < 0.001$ ).

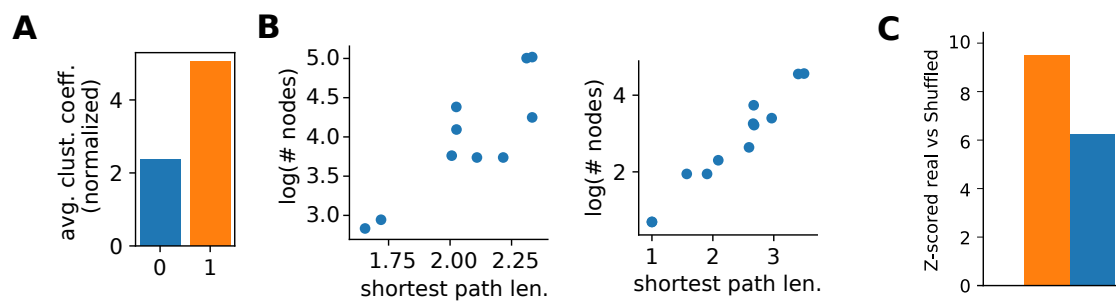

**Figure S5. Small worldness of EE subnetwork.** (A) Average clustering coefficient of excitatory subnetworks normalized against the same values computed on ER random graphs with matching edges density (Fig 2). (B) Left: log-nodes number vs shortest path length in the largest connected component of excitatory subnetworks with standard significance threshold at  $|w| > 4.5$  (two dots per animal: familiar and novel). Right: same as left for excitatory subnetworks with higher significance threshold at  $|w| > 6$ . (C) Overexpression of triangles in real networks against random shuffling of the edges that preserved the number of incident edges onto each single node (see Methods).

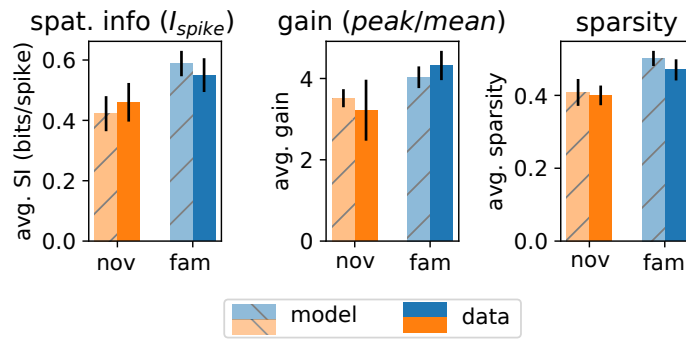

**Figure S6. Marginal statistics of place cells in hippocampus match circuit model.** The interactions in the model were drawn from the inferred couplings observed in data and rescaled according to Supp. Fig. 1A. Afterwards, we fixed the input strength by picking the parameters that allowed the model to best match the marginal statistics observed in data. All the measures were computed on traditional 2D firing rate maps (see Methods). (left) single cell spatial information, (center) firing rate map gain, measured as peak over mean (right) firing rate sparsity.



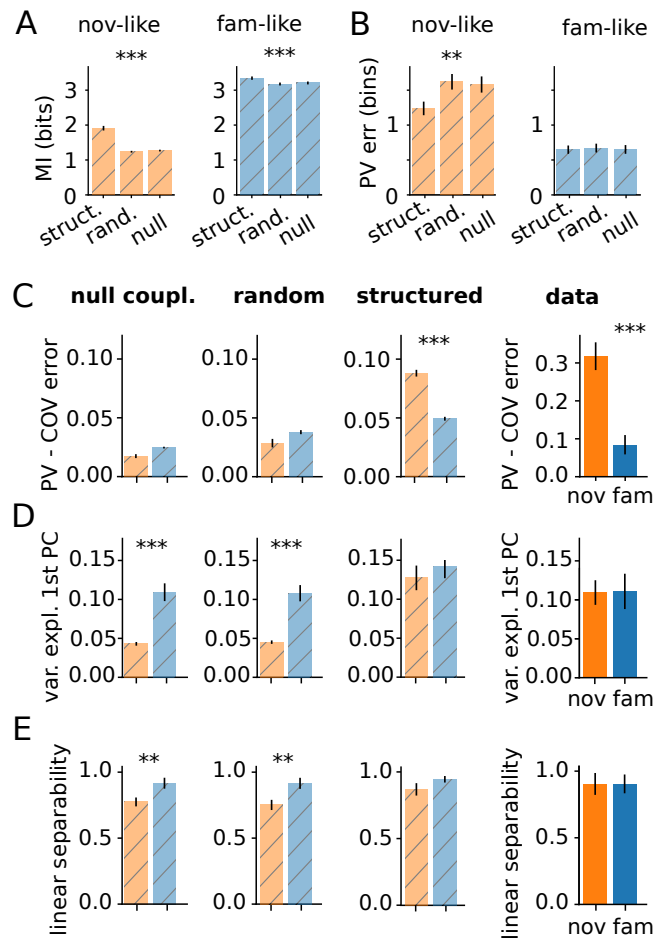

**Figure S7. Comparison with null couplings.** (A) Estimated spatial information (MI; error bar – 99th percentile CI for the mean) using structured, random and null interactions, in the novel-like and familiar-like scenario (see text). Structured interactions significantly increase the spatial information ( $p < 0.001$  (\*\*\*) or  $p < 0.01$  (\*\*)) under a non-parametric Mann–Whitney U-test. (B) Decoding error using a simple population vector approach (PV; error bar – 99th percentile CI for the mean) using structured, random and null interactions, in the novel-like and familiar-like scenario. Structured interactions significantly decrease the average decoding error in novel environments ( $p < 0.01$  (\*\*)) under a non-parametric Mann–Whitney U-test. (C) Improvement in decoding performance by taking into account co-variability of cells (“COV” decoder) relative to a simple population vector (“PV”) decoder, evaluated on  $4 \cdot 10^4$  samples). (error bars and significance tests as in B). (D) Fraction of variance explained by the first principal component of population vectors for  $10^3$  random pairs of locations in the maze. The fraction is unchanged between the novel and familiar environments on structured network and on real data, but differs significantly on the random and null networks (error bars and significance tests as in B). (E) Linear separability measured as SVM classification accuracy of random pairs of stimuli (trained on 1000 pairs of same vs. different positions). The separability is unchanged between the novel and familiar environments on structured network and on real data, but differs significantly on the random and null networks.

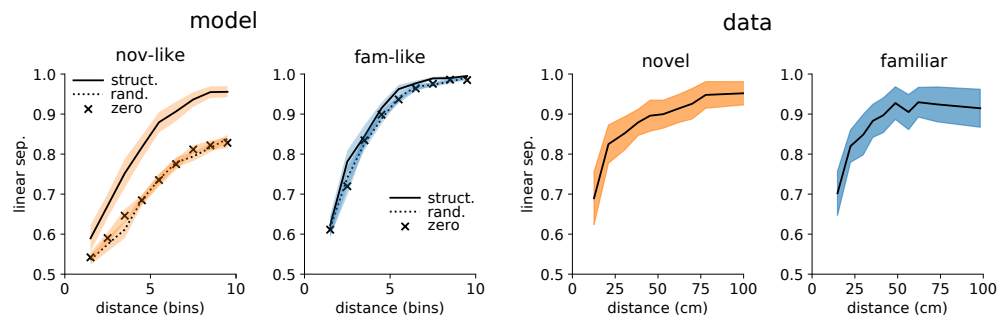

**Figure S8.** Linear separability as a function of distance. Left: linear separability of responses to stimuli at a given distance for data-like copulating structure (solid line), random connectivity (dotted) or null couplings (x) for novel-like (orange) and familiar-like (blue) input quality. Right: linear separability of responses to stimuli at a given distance for data novel environments (orange) and familiar (blue).

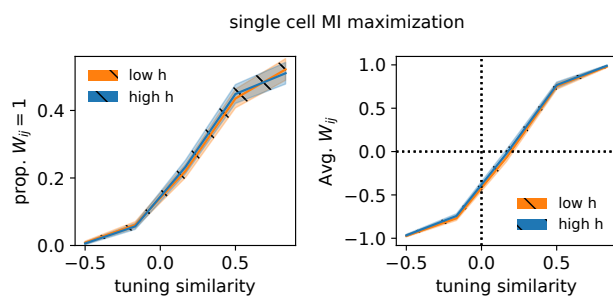

**Figure S9. Single cell MI optimization.** Optimizing the mutual information between single cells stimulus-dependent (marginalized) activity and location-stimulus led to the same result for each level of input noise – almost linear relation between place field overlap and optimal predicted  $W_{ij}$ .

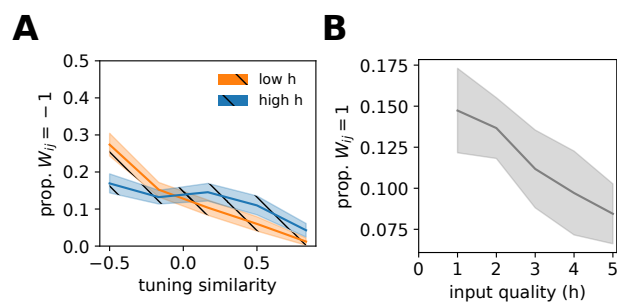

**Figure S10. Negatively coupled optimized connections and proportion of strongest.** **A** Proportion of cell pairs to reach minimum allowed  $W_{ij}$  as a function of tuning similarity. **B** Proportion of cell pairs that reached maximum  $W_{ij} = 1$  (after optimization) decreased for increasing input quality  $h$ .

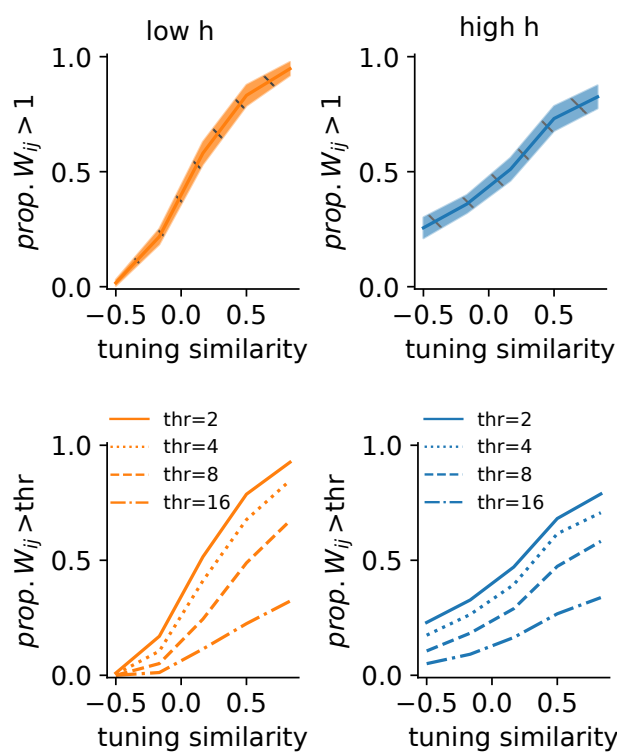

**Figure S11. Non constrained maximization does not show nonlinear coupling preferences.** Top row: Proportion of couplings that exceed 1 after optimization. Couplings were optimized so to maximize the mutual information between population responses and stimuli. The average population firing rate was constrained but  $W_{ij}$ s were not. Bottom row: mean proportion of couplings that exceed different thresholds also do not show the nonlinear relation we observed in the constrained case.



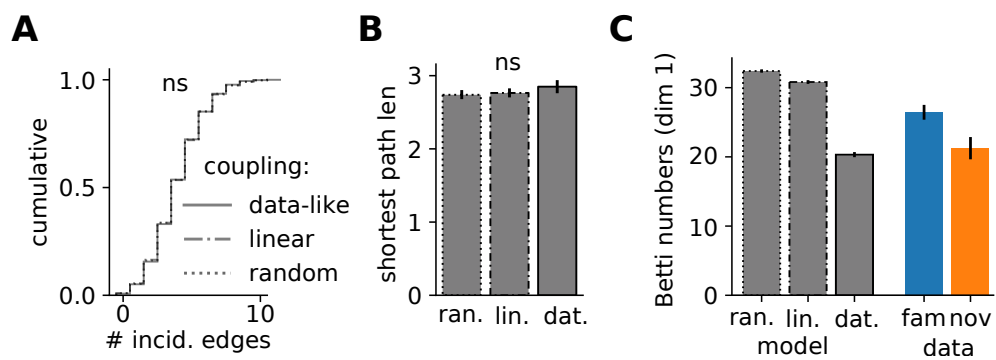

**Figure S12. Topology** (A) Distribution of incident edges with the three different connectivity-rules. (B) Average shortest path length. 1-way ANOVA  $p > 0.05$ . (C) Betti numbers of the clique complex induced by the graph ( $b_1$ ) for 1-dim holes. Using the data-like nonlinear coupling strategy increased the chance of creating triangles, hence diminishing the number of 1-dim cavities.

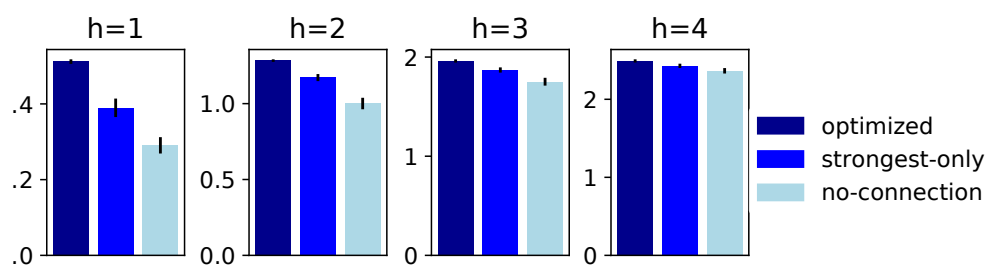

**Figure S13. Strongest couplings only.** After optimizing the connections  $W$  (as in Fig. 4), the MI of the fully optimized networks was compared to null couplings and the "strongest only" case, i.e., where every connection  $|W_{ij}| < 1$  was set to 0.
